# Supplementary material
Source: PubMed Central journal article supplement (PMC3575924)
Supplement: pro0021-1948-SD1.pdf [file pro0021-1948-SD1.pdf]

## SUPPORTING INFORMATION FOR

### *Determination of amyloid core structure using chemical shifts*

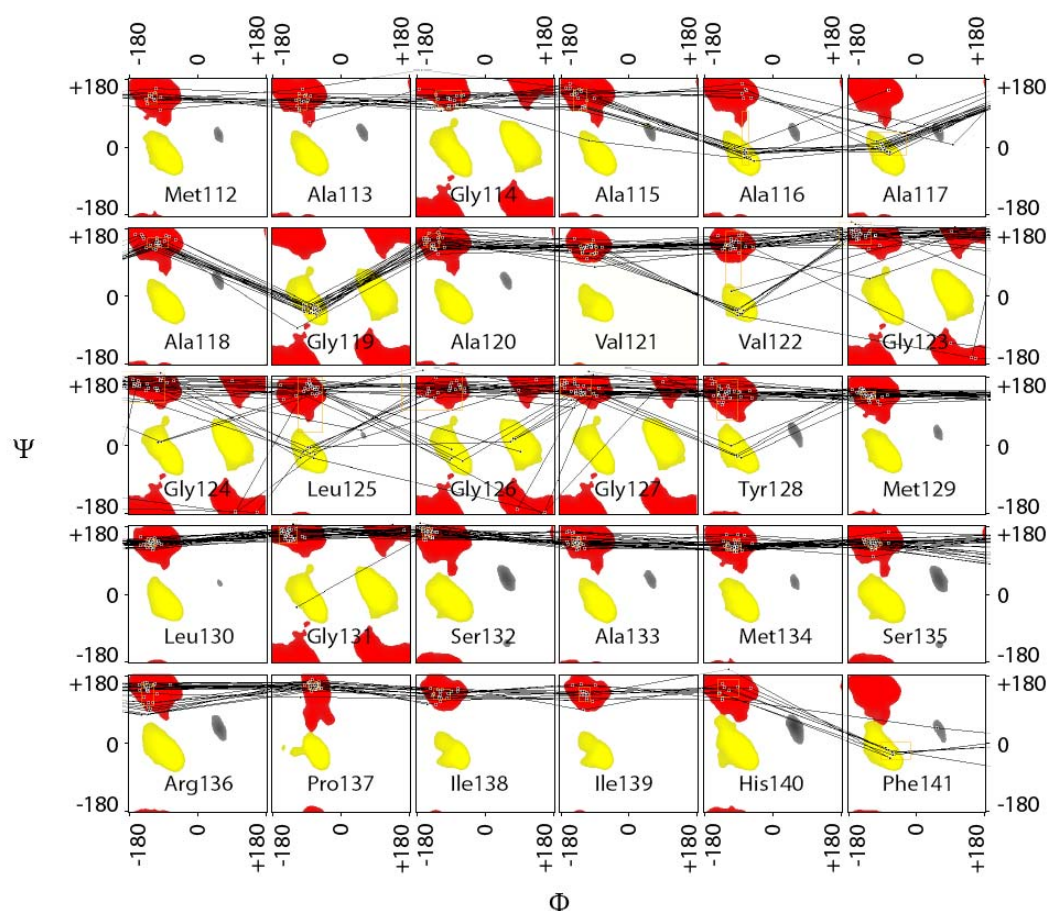

**Figure S1.** Backbone dihedral angles predicted by CS-Rosetta from solid-state NMR chemical shifts that were observed for residues M112-F141 in fibrils of humPrP(23-144)<sup>[2]</sup>. For each residue the dihedral angles are shown that were found in the ten best 9-residue fragments selected by CS-Rosetta. Energetically favorable conformations of the polypeptide chain are marked in red (extended), yellow (helical) and grey (left handed helix). Dihedral angles found in single 9-residue fragments are connected by lines. To avoid occurrence of end effects, a Ser-Gly linker with random coil chemical shifts was added at the N- and C-terminal ends of the 112-141 residue stretch.

## Script for running CS-Rosetta

```
#!/bin/csh
#
# CS-ROSETTA: System for Chemical Shifts based protein structure prediction
using ROSETTA
# (C) Shen and Bax 2007-2009, Lab of Chemical Physics, NIDDK, NIH
# Version 1.01(build 2009.1117.15)
#
# runRosetta.com: performs ROSETTA structure generation
#

set outDir = `cat paths.txt | awk '$1~"score"{print $2}`

set rand_1 = `( ps ax && netstat -a && date ) | sum | cut -c1-6`
set rand_2 = `( ps ax && netstat -a && date ) | sum | cut -c1-2`
set rand = ${rand_1}${rand_2}

if (!( -d ${outDir} ) ) then
    mkdir -p ${outDir}
endif

${rosetta} aa t000 _ -silent -output_silent -constant_seed -cst cst -jran $rand
-increase_cycles 10 -new_centroid_packing -abrelax -output_chi_silent -
stringent_relax -vary_omega -omega_weight 0.5 -farlx -ex1 -ex2 -termini -
short_range_hb_weight 0.50 -long_range_hb_weight 1.0 -no_filters -rg_reweight
0.5 -rsd_wt_helix 0.5 -rsd_wt_loop 0.5 -output_all -accept_all -
do_farlx_checkpointing -relax_score_filter -record_irms_before_relax -
acceptance_rate 1.0 -filter1a 10000 -filter1b 10000 -nstruct 5000
```

## Input files used in CS-Rosetta modelling of the amyloid core of HET-s(218-289)

### Primary sequence

Filename: t000\_.fasta

>

```
GRNSAKDIRTEERARVQLGNVVTAAALGSGSGSGSGSGSTTNSVETVVGKGESRVLIGNEYGGKGFSGSGSGSGSGR
NSAKDIRTEERARVQLGNVVTAAALGSGSGSGSGSGSTTNSVETVVGKGESRVLIGNEYGGKGFSGSGSGSGSGRNS
AKDIRTEERARVQLGNVVTAAAL
```

## Experimental chemical shifts

```
Filename: inCS.tab
DATA SEQUENCE GR
NSAKDIRTEERARVQLGNVVT AAAL
GSGSGSGSGSGS
DATA SEQUENCE TT
NSVETVVGKGESRVLIGNEYG GKGF
GSGSGSGSGSGS
DATA SEQUENCE GR
NSAKDIRTEERARVQLGNVVT AAAL
GSGSGSGSGSGS
DATA SEQUENCE TT
NSVETVVGKGESRVLIGNEYG GKGF
GSGSGSGSGSGS
DATA SEQUENCE GR
NSAKDIRTEERARVQLGNVVT AAAL

VARS RESID RESNAME
ATOMNAME SHIFT
FORMAT %4d %1s %4s %8.3f

1 G CA 43.791
1 G N 109.800
2 R C 174.357
2 R CA 54.691
2 R N 118.400
3 N C 175.157
3 N CA 52.091
3 N CB 39.998
3 N N 125.900
4 S C 172.357
4 S CA 56.791
4 S CB 67.298
4 S N 119.300
5 A C 177.357
5 A CA 49.491
5 A CB 23.998
5 A N 122.900
6 K C 175.657
6 K CA 59.891
6 K CB 32.798
6 K N 123.400
7 D C 174.857
7 D CA 53.191
7 D CB 45.198
7 D N 118.000
8 I C 175.057
8 I CA 60.891
8 I CB 41.898
8 I N 122.900
9 R C 175.957
9 R CA 54.291
9 R CB 33.198
9 R N 130.100
10 T C 174.957
10 T CA 59.591
10 T CB 71.898
10 T N 113.600
11 E C 174.257
11 E CA 53.791
11 E CB 33.998
11 E N 120.300
12 E C 174.657
12 E CA 58.691
12 E CB 27.598
12 E N 117.500
13 R C 176.757
13 R CA 54.791
13 R CB 30.798
13 R N 123.000
14 A C 176.557
14 A CA 53.191
14 A CB 19.998
14 A N 126.000
15 R C 175.157
15 R CA 54.691

15 R CB 35.498
15 R N 118.400
16 V C 173.657
16 V CA 59.991
16 V CB 37.098
16 V N 123.000
17 Q C 173.657
17 Q CA 52.791
17 Q CB 33.098
17 Q N 126.900
18 L CA 52.791
18 L CB 44.898
18 L N 131.600
19 G CA 43.791
19 G N 113.900
20 N C 176.557
20 N CA 51.291
20 N CB 40.198
20 N N 110.200
21 V C 174.957
21 V CA 62.091
21 V CB 34.498
21 V N 123.100
22 V C 175.657
22 V CA 61.091
22 V CB 32.298
22 V N 129.200
23 T C 175.757
23 T CA 62.391
23 T CB 70.998
23 T N 116.700

24 A C 179.657
24 A CA 56.191
24 A CB 17.198
24 A N 121.400
25 A C 179.757
25 A CA 55.091
25 A CB 18.498
25 A N 119.500
26 A C 178.657
26 A CA 53.891
26 A CB 19.198
26 A N 120.900
27 L C 179.057
27 L CA 58.391
27 L CB 41.598
27 L N 120.900

28 G C 174.900
28 G CA 45.100
28 G N 108.800
29 S C 174.600
29 S CA 58.300
29 S CB 63.800
29 S N 115.700
30 G C 174.900
30 G CA 45.100
30 G N 108.800
31 S C 174.600
31 S CA 58.300
31 S CB 63.800
31 S N 115.700
32 G C 174.900
32 G CA 45.100
32 G N 108.800
33 S C 174.600
33 S CA 58.300
33 S CB 63.800
33 S N 115.700
34 G C 174.900
34 G CA 45.100
34 G N 108.800
35 S C 174.600
35 S CA 58.300
35 S CB 63.800

35 S N 115.700
36 G C 174.900
36 G CA 45.100
36 G N 108.800
37 S C 174.600
37 S CA 58.300
37 S CB 63.800
37 S N 115.700
38 G C 174.900
38 G CA 45.100
38 G N 108.800
39 S C 174.600
39 S CA 58.300
39 S CB 63.800
39 S N 115.700

40 T C 175.657
40 T CA 66.191
40 T CB 69.998
40 T N 122.800
41 T C 172.857
41 T CA 61.191
41 T CB 70.898
41 T N 124.100
42 N C 175.157
42 N CA 52.391
42 N CB 41.098
42 N N 128.100
43 S C 172.057
43 S CA 56.491
43 S CB 66.198
43 S N 117.700
44 V C 174.957
44 V CB 35.698
44 V N 125.500
45 E C 176.357
45 E CA 59.491
45 E CB 29.598
45 E N 127.400
46 T C 173.357
46 T CA 60.891
46 T CB 71.698
46 T N 113.100
47 V C 175.757
47 V CA 60.691
47 V CB 35.698
47 V N 124.300
48 V C 175.557
48 V CA 61.191
48 V CB 34.298
48 V N 128.700
49 G C 172.557
49 G CA 44.591
49 G N 113.600
50 K C 177.157
50 K CA 54.291
50 K CB 35.398
50 K N 121.800
51 G C 172.557
51 G CA 48.491
51 G N 115.800
52 E C 176.857
52 E CA 54.191
52 E CB 30.098
52 E N 128.800
53 S C 173.957
53 S CA 59.291
53 S CB 66.898
53 S N 116.600
54 R C 176.057
54 R CA 54.891
54 R CB 32.998
54 R N 118.100
55 V C 173.357
55 V CA 60.291
55 V CB 36.198
```

|      |    |         |      |    |         |       |    |         |
|------|----|---------|------|----|---------|-------|----|---------|
| 55 V | N  | 123.000 | 77 G | C  | 174.900 | 98 N  | C  | 176.557 |
| 56 L | C  | 174.257 | 77 G | CA | 45.100  | 98 N  | CA | 51.291  |
| 56 L | CA | 52.691  | 77 G | N  | 108.800 | 98 N  | CB | 40.198  |
| 56 L | CB | 43.698  | 78 S | C  | 174.600 | 98 N  | N  | 110.200 |
| 56 L | N  | 130.600 | 78 S | CA | 58.300  | 99 V  | C  | 174.957 |
| 57 I | C  | 173.757 | 78 S | CB | 63.800  | 99 V  | CA | 62.091  |
| 57 I | CA | 58.691  | 78 S | N  | 115.700 | 99 V  | CB | 34.498  |
| 57 I | CB | 35.798  | 79 G | CA | 43.791  | 99 V  | N  | 123.100 |
| 57 I | N  | 130.400 | 79 G | N  | 109.800 | 100 V | C  | 175.657 |
| 58 G | C  | 172.557 | 80 R | C  | 174.357 | 100 V | CA | 61.091  |
| 58 G | CA | 43.991  | 80 R | CA | 54.691  | 100 V | CB | 32.298  |
| 58 G | N  | 111.600 | 80 R | N  | 118.400 | 100 V | N  | 129.200 |
| 59 N | C  | 173.457 | 81 N | C  | 175.157 | 101 T | C  | 175.757 |
| 59 N | CA | 51.891  | 81 N | CA | 52.091  | 101 T | CA | 62.391  |
| 59 N | CB | 40.598  | 81 N | CB | 39.998  | 101 T | CB | 70.998  |
| 59 N | N  | 114.800 | 81 N | N  | 125.900 | 101 T | N  | 116.700 |
| 60 E | C  | 175.357 | 82 S | C  | 172.357 | 102 A | C  | 179.657 |
| 60 E | CA | 54.591  | 82 S | CA | 56.791  | 102 A | CA | 56.191  |
| 60 E | CB | 33.498  | 82 S | CB | 67.298  | 102 A | CB | 17.198  |
| 60 E | N  | 120.600 | 82 S | N  | 119.300 | 102 A | N  | 121.400 |
| 61 Y | C  | 176.857 | 83 A | C  | 177.357 | 103 A | C  | 179.757 |
| 61 Y | CA | 56.091  | 83 A | CA | 49.491  | 103 A | CA | 55.091  |
| 61 Y | CB | 40.498  | 83 A | CB | 23.998  | 103 A | CB | 18.498  |
| 61 Y | N  | 129.100 | 83 A | N  | 122.900 | 103 A | N  | 119.500 |
| 62 G | C  | 174.757 | 84 K | C  | 175.657 | 104 A | C  | 178.657 |
| 62 G | CA | 46.091  | 84 K | CA | 59.891  | 104 A | CA | 53.891  |
| 62 G | N  | 110.300 | 84 K | CB | 32.798  | 104 A | CB | 19.198  |
| 63 G | C  | 173.557 | 84 K | N  | 123.400 | 104 A | N  | 120.900 |
| 63 G | CA | 43.891  | 85 D | C  | 174.857 | 105 L | C  | 179.057 |
| 63 G | N  | 113.400 | 85 D | CA | 53.191  | 105 L | CA | 58.391  |
| 64 K | C  | 177.957 | 85 D | CB | 45.198  | 105 L | CB | 41.598  |
| 64 K | CA | 57.291  | 85 D | N  | 118.000 | 105 L | N  | 120.900 |
| 64 K | CB | 33.598  | 86 I | C  | 175.057 | 106 G | C  | 174.900 |
| 64 K | N  | 125.700 | 86 I | CA | 60.891  | 106 G | CA | 45.100  |
| 65 G | C  | 175.257 | 86 I | CB | 41.898  | 106 G | N  | 108.800 |
| 65 G | CA | 44.291  | 86 I | N  | 122.900 | 107 S | C  | 174.600 |
| 65 G | N  | 108.900 | 87 R | C  | 175.957 | 107 S | CA | 58.300  |
| 66 F | C  | 175.557 | 87 R | CA | 54.291  | 107 S | CB | 63.800  |
| 66 F | CA | 59.691  | 87 R | CB | 33.198  | 107 S | N  | 115.700 |
| 66 F | CB | 41.398  | 87 R | N  | 130.100 | 108 G | C  | 174.900 |
| 66 F | N  | 127.600 | 88 T | C  | 174.957 | 108 G | CA | 45.100  |
| 67 G | C  | 174.900 | 88 T | CA | 59.591  | 108 G | N  | 108.800 |
| 67 G | CA | 45.100  | 88 T | CB | 71.898  | 109 S | C  | 174.600 |
| 67 G | N  | 108.800 | 88 T | N  | 113.600 | 109 S | CA | 58.300  |
| 68 S | C  | 174.600 | 89 E | C  | 174.257 | 109 S | CB | 63.800  |
| 68 S | CA | 58.300  | 89 E | CA | 53.791  | 109 S | N  | 115.700 |
| 68 S | CB | 63.800  | 89 E | CB | 33.998  | 110 G | C  | 174.900 |
| 68 S | N  | 115.700 | 89 E | N  | 120.300 | 110 G | CA | 45.100  |
| 69 G | C  | 174.900 | 90 E | C  | 174.657 | 110 G | N  | 108.800 |
| 69 G | CA | 45.100  | 90 E | CA | 58.691  | 111 S | C  | 174.600 |
| 69 G | N  | 108.800 | 90 E | CB | 27.598  | 111 S | CA | 58.300  |
| 70 S | C  | 174.600 | 91 R | C  | 176.757 | 111 S | CB | 63.800  |
| 70 S | CA | 58.300  | 91 R | CA | 54.791  | 111 S | N  | 115.700 |
| 70 S | CB | 63.800  | 91 R | CB | 30.798  | 112 G | C  | 174.900 |
| 70 S | N  | 115.700 | 91 R | N  | 123.000 | 112 G | CA | 45.100  |
| 71 G | C  | 174.900 | 92 A | C  | 176.557 | 112 G | N  | 108.800 |
| 71 G | CA | 45.100  | 92 A | CA | 53.191  | 113 S | C  | 174.600 |
| 71 G | N  | 108.800 | 92 A | CB | 19.998  | 113 S | CA | 58.300  |
| 72 S | C  | 174.600 | 92 A | N  | 126.000 | 113 S | CB | 63.800  |
| 72 S | CA | 58.300  | 93 R | C  | 175.157 | 113 S | N  | 115.700 |
| 72 S | CB | 63.800  | 93 R | CA | 54.691  | 114 G | C  | 174.900 |
| 72 S | N  | 115.700 | 93 R | CB | 35.498  | 114 G | CA | 45.100  |
| 73 G | C  | 174.900 | 93 R | N  | 118.400 | 114 G | N  | 108.800 |
| 73 G | CA | 45.100  | 94 V | C  | 173.657 | 115 S | C  | 174.600 |
| 73 G | N  | 108.800 | 94 V | CA | 59.991  | 115 S | CA | 58.300  |
| 74 S | C  | 174.600 | 94 V | CB | 37.098  | 115 S | CB | 63.800  |
| 74 S | CA | 58.300  | 94 V | N  | 123.000 | 115 S | N  | 115.700 |
| 74 S | CB | 63.800  | 95 Q | C  | 173.657 | 116 G | C  | 174.900 |
| 74 S | N  | 115.700 | 95 Q | CA | 52.791  | 116 G | CA | 45.100  |
| 75 G | C  | 174.900 | 95 Q | CB | 33.098  | 116 G | N  | 108.800 |
| 75 G | CA | 45.100  | 95 Q | N  | 126.900 | 117 S | C  | 174.600 |
| 75 G | N  | 108.800 | 96 L | CA | 52.791  | 117 S | CA | 58.300  |
| 76 S | C  | 174.600 | 96 L | CB | 44.898  | 117 S | CB | 63.800  |
| 76 S | CA | 58.300  | 96 L | N  | 131.600 | 117 S | N  | 115.700 |
| 76 S | CB | 63.800  | 97 G | CA | 43.791  | 118 T | C  | 175.657 |
| 76 S | N  | 115.700 | 97 G | N  | 113.900 |       |    |         |

|       |    |         |       |    |         |       |    |         |
|-------|----|---------|-------|----|---------|-------|----|---------|
| 118 T | CA | 66.191  | 138 E | N  | 120.600 | 161 A | C  | 177.357 |
| 118 T | CB | 69.998  | 139 Y | C  | 176.857 | 161 A | CA | 49.491  |
| 118 T | N  | 122.800 | 139 Y | CA | 56.091  | 161 A | CB | 23.998  |
| 119 T | C  | 172.857 | 139 Y | CB | 40.498  | 161 A | N  | 122.900 |
| 119 T | CA | 61.191  | 139 Y | N  | 129.100 | 162 K | C  | 175.657 |
| 119 T | CB | 70.898  | 140 G | C  | 174.757 | 162 K | CA | 59.891  |
| 119 T | N  | 124.100 | 140 G | CA | 46.091  | 162 K | CB | 32.798  |
| 120 N | C  | 175.157 | 140 G | N  | 110.300 | 162 K | N  | 123.400 |
| 120 N | CA | 52.391  |       |    |         | 163 D | C  | 174.857 |
| 120 N | CB | 41.098  | 141 G | C  | 173.557 | 163 D | CA | 53.191  |
| 120 N | N  | 128.100 | 141 G | CA | 43.891  | 163 D | CB | 45.198  |
| 121 S | C  | 172.057 | 141 G | N  | 113.400 | 163 D | N  | 118.000 |
| 121 S | CA | 56.491  | 142 K | C  | 177.957 | 164 I | C  | 175.057 |
| 121 S | CB | 66.198  | 142 K | CA | 57.291  | 164 I | CA | 60.891  |
| 121 S | N  | 117.700 | 142 K | CB | 33.598  | 164 I | CB | 41.898  |
| 122 V | C  | 174.957 | 142 K | N  | 125.700 | 164 I | N  | 122.900 |
| 122 V | CB | 35.698  | 143 G | C  | 175.257 | 165 R | C  | 175.957 |
| 122 V | N  | 125.500 | 143 G | CA | 44.291  | 165 R | CA | 54.291  |
| 123 E | C  | 176.357 | 143 G | N  | 108.900 | 165 R | CB | 33.198  |
| 123 E | CA | 59.491  | 144 F | C  | 175.557 | 165 R | N  | 130.100 |
| 123 E | CB | 29.598  | 144 F | CA | 59.691  | 166 T | C  | 174.957 |
| 123 E | N  | 127.400 | 144 F | CB | 41.398  | 166 T | CA | 59.591  |
| 124 T | C  | 173.357 | 144 F | N  | 127.600 | 166 T | CB | 71.898  |
| 124 T | CA | 60.891  | 145 G | C  | 174.900 | 166 T | N  | 113.600 |
| 124 T | CB | 71.698  | 145 G | CA | 45.100  | 167 E | C  | 174.257 |
| 124 T | N  | 113.100 | 145 G | N  | 108.800 | 167 E | CA | 53.791  |
| 125 V | C  | 175.757 | 146 S | C  | 174.600 | 167 E | CB | 33.998  |
| 125 V | CA | 60.691  | 146 S | CA | 58.300  | 167 E | N  | 120.300 |
| 125 V | CB | 35.698  | 146 S | CB | 63.800  | 168 E | C  | 174.657 |
| 125 V | N  | 124.300 | 146 S | N  | 115.700 | 168 E | CA | 58.691  |
| 126 V | C  | 175.557 | 147 G | C  | 174.900 | 168 E | CB | 27.598  |
| 126 V | CA | 61.191  | 147 G | CA | 45.100  | 168 E | N  | 117.500 |
| 126 V | CB | 34.298  | 147 G | N  | 108.800 | 169 R | C  | 176.757 |
| 126 V | N  | 128.700 | 148 S | C  | 174.600 | 169 R | CA | 54.791  |
| 127 G | C  | 172.557 | 148 S | CA | 58.300  | 169 R | CB | 30.798  |
| 127 G | CA | 44.591  | 148 S | CB | 63.800  | 169 R | N  | 123.000 |
| 127 G | N  | 113.600 | 148 S | N  | 115.700 | 170 A | C  | 176.557 |
| 128 K | C  | 177.157 | 149 G | C  | 174.900 | 170 A | CA | 53.191  |
| 128 K | CA | 54.291  | 149 G | CA | 45.100  | 170 A | CB | 19.998  |
| 128 K | CB | 35.398  | 149 G | N  | 108.800 | 170 A | N  | 126.000 |
| 128 K | N  | 121.800 | 150 S | C  | 174.600 | 171 R | C  | 175.157 |
| 129 G | C  | 172.557 | 150 S | CA | 58.300  | 171 R | CA | 54.691  |
| 129 G | CA | 48.491  | 150 S | CB | 63.800  | 171 R | CB | 35.498  |
| 129 G | N  | 115.800 | 150 S | N  | 115.700 | 171 R | N  | 118.400 |
| 130 E | C  | 176.857 | 151 G | C  | 174.900 | 172 V | C  | 173.657 |
| 130 E | CA | 54.191  | 151 G | CA | 45.100  | 172 V | CA | 59.991  |
| 130 E | CB | 30.098  | 151 G | N  | 108.800 | 172 V | CB | 37.098  |
| 130 E | N  | 128.800 | 152 S | C  | 174.600 | 172 V | N  | 123.000 |
| 131 S | C  | 173.957 | 152 S | CA | 58.300  | 173 Q | C  | 173.657 |
| 131 S | CA | 59.291  | 152 S | CB | 63.800  | 173 Q | CA | 52.791  |
| 131 S | CB | 66.898  | 152 S | N  | 115.700 | 173 Q | CB | 33.098  |
| 131 S | N  | 116.600 | 153 G | C  | 174.900 | 173 Q | N  | 126.900 |
| 132 R | C  | 176.057 | 153 G | CA | 45.100  | 174 L | CA | 52.791  |
| 132 R | CA | 54.891  | 153 G | N  | 108.800 | 174 L | CB | 44.898  |
| 132 R | CB | 32.998  | 154 S | C  | 174.600 | 174 L | N  | 131.600 |
| 132 R | N  | 118.100 | 154 S | CA | 58.300  | 175 G | CA | 43.791  |
| 133 V | C  | 173.357 | 154 S | CB | 63.800  | 175 G | N  | 113.900 |
| 133 V | CA | 60.291  | 154 S | N  | 115.700 | 176 N | C  | 176.557 |
| 133 V | CB | 36.198  | 155 G | C  | 174.900 | 176 N | CA | 51.291  |
| 133 V | N  | 123.000 | 155 G | CA | 45.100  | 176 N | CB | 40.198  |
| 134 L | C  | 174.257 | 155 G | N  | 108.800 | 176 N | N  | 110.200 |
| 134 L | CA | 52.691  | 156 S | C  | 174.600 | 177 V | C  | 174.957 |
| 134 L | CB | 43.698  | 156 S | CA | 58.300  | 177 V | CA | 62.091  |
| 134 L | N  | 130.600 | 156 S | CB | 63.800  | 177 V | CB | 34.498  |
| 135 I | C  | 173.757 | 156 S | N  | 115.700 | 177 V | N  | 123.100 |
| 135 I | CA | 58.691  | 157 G | CA | 43.791  | 178 V | C  | 175.657 |
| 135 I | CB | 35.798  | 157 G | N  | 109.800 | 178 V | CA | 61.091  |
| 135 I | N  | 130.400 | 158 R | C  | 174.357 | 178 V | CB | 32.298  |
| 136 G | C  | 172.557 | 158 R | CA | 54.691  | 178 V | N  | 129.200 |
| 136 G | CA | 43.991  | 158 R | N  | 118.400 | 179 T | C  | 175.757 |
| 136 G | N  | 111.600 | 159 N | C  | 175.157 | 179 T | CA | 62.391  |
| 137 N | C  | 173.457 | 159 N | CA | 52.091  | 179 T | CB | 70.998  |
| 137 N | CA | 51.891  | 159 N | CB | 39.998  | 179 T | N  | 116.700 |
| 137 N | CB | 40.598  | 159 N | N  | 125.900 | 180 A | C  | 179.657 |
| 137 N | N  | 114.800 | 160 S | C  | 172.357 | 180 A | CA | 56.191  |
| 138 E | C  | 175.357 | 160 S | CA | 56.791  | 180 A | CB | 17.198  |
| 138 E | CA | 54.591  | 160 S | CB | 67.298  | 180 A | N  | 121.400 |
| 138 E | CB | 33.498  | 160 S | N  | 119.300 | 181 A | C  | 179.757 |

|       |    |         |
|-------|----|---------|
| 181 A | CA | 55.091  |
| 181 A | CB | 18.498  |
| 181 A | N  | 119.500 |
| 182 A | C  | 178.657 |

|       |    |         |
|-------|----|---------|
| 182 A | CA | 53.891  |
| 182 A | CB | 19.198  |
| 182 A | N  | 120.900 |
| 183 L | C  | 179.057 |

|       |    |         |
|-------|----|---------|
| 183 L | CA | 58.391  |
| 183 L | CB | 41.598  |
| 183 L | N  | 120.900 |

# Distance restraints

Filename: t000\_.cst

NMR\_v3.0  
distance constraints for HetS 5-mer with 16mer  
linkers  
data set for 8 -fold polymer, 8 -fold hydrogen  
bond and 8 -fold Ha\_HN distance constraints  
7184

|     |   |     |   |      |      |      |     |   |     |   |      |      |      |     |   |     |   |      |      |      |
|-----|---|-----|---|------|------|------|-----|---|-----|---|------|------|------|-----|---|-----|---|------|------|------|
| 41  | O | 3   | H | 1.80 | 0.00 | 1.80 | 124 | O | 164 | N | 2.70 | 0.00 | 2.70 | 177 | O | 139 | H | 1.80 | 0.00 | 1.80 |
| 41  | O | 3   | N | 2.70 | 0.00 | 2.70 | 164 | O | 126 | H | 1.80 | 0.00 | 1.80 | 177 | O | 139 | N | 2.70 | 0.00 | 2.70 |
| 3   | O | 43  | H | 1.80 | 0.00 | 1.80 | 164 | O | 126 | N | 2.70 | 0.00 | 2.70 | 139 | O | 179 | H | 1.80 | 0.00 | 1.80 |
| 3   | O | 43  | N | 2.70 | 0.00 | 2.70 | 126 | O | 166 | H | 1.80 | 0.00 | 1.80 | 139 | O | 179 | N | 2.70 | 0.00 | 2.70 |
| 43  | O | 5   | H | 1.80 | 0.00 | 1.80 | 126 | O | 166 | N | 2.70 | 0.00 | 2.70 | 41  | O | 3   | H | 1.80 | 0.00 | 1.80 |
| 43  | O | 5   | N | 2.70 | 0.00 | 2.70 | 51  | O | 13  | H | 1.80 | 0.00 | 1.80 | 41  | O | 3   | N | 2.70 | 0.00 | 2.70 |
| 43  | O | 5   | H | 1.80 | 0.00 | 1.80 | 51  | O | 13  | N | 2.70 | 0.00 | 2.70 | 3   | O | 43  | H | 1.80 | 0.00 | 1.80 |
| 43  | O | 5   | N | 2.70 | 0.00 | 2.70 | 13  | O | 53  | H | 1.80 | 0.00 | 1.80 | 3   | O | 43  | N | 2.70 | 0.00 | 2.70 |
| 5   | O | 45  | H | 1.80 | 0.00 | 1.80 | 13  | O | 53  | N | 2.70 | 0.00 | 2.70 | 43  | O | 5   | H | 1.80 | 0.00 | 1.80 |
| 5   | O | 45  | N | 2.70 | 0.00 | 2.70 | 53  | O | 15  | H | 1.80 | 0.00 | 1.80 | 43  | O | 5   | N | 2.70 | 0.00 | 2.70 |
| 45  | O | 7   | H | 1.80 | 0.00 | 1.80 | 53  | O | 15  | N | 2.70 | 0.00 | 2.70 | 43  | O | 5   | H | 1.80 | 0.00 | 1.80 |
| 45  | O | 7   | N | 2.70 | 0.00 | 2.70 | 15  | O | 55  | H | 1.80 | 0.00 | 1.80 | 43  | O | 5   | N | 2.70 | 0.00 | 2.70 |
| 80  | O | 42  | H | 1.80 | 0.00 | 1.80 | 15  | O | 55  | N | 2.70 | 0.00 | 2.70 | 5   | O | 45  | H | 1.80 | 0.00 | 1.80 |
| 80  | O | 42  | N | 2.70 | 0.00 | 2.70 | 55  | O | 17  | H | 1.80 | 0.00 | 1.80 | 5   | O | 45  | N | 2.70 | 0.00 | 2.70 |
| 42  | O | 82  | H | 1.80 | 0.00 | 1.80 | 55  | O | 17  | N | 2.70 | 0.00 | 2.70 | 45  | O | 7   | H | 1.80 | 0.00 | 1.80 |
| 42  | O | 82  | N | 2.70 | 0.00 | 2.70 | 17  | O | 57  | H | 1.80 | 0.00 | 1.80 | 45  | O | 7   | N | 2.70 | 0.00 | 2.70 |
| 82  | O | 44  | H | 1.80 | 0.00 | 1.80 | 17  | O | 57  | N | 2.70 | 0.00 | 2.70 | 80  | O | 42  | H | 1.80 | 0.00 | 1.80 |
| 82  | O | 44  | N | 2.70 | 0.00 | 2.70 | 90  | O | 52  | H | 1.80 | 0.00 | 1.80 | 80  | O | 42  | N | 2.70 | 0.00 | 2.70 |
| 82  | O | 44  | H | 1.80 | 0.00 | 1.80 | 90  | O | 52  | N | 2.70 | 0.00 | 2.70 | 42  | O | 82  | H | 1.80 | 0.00 | 1.80 |
| 82  | O | 44  | N | 2.70 | 0.00 | 2.70 | 52  | O | 92  | H | 1.80 | 0.00 | 1.80 | 42  | O | 82  | N | 2.70 | 0.00 | 2.70 |
| 44  | O | 84  | H | 1.80 | 0.00 | 1.80 | 52  | O | 92  | N | 2.70 | 0.00 | 2.70 | 82  | O | 44  | H | 1.80 | 0.00 | 1.80 |
| 44  | O | 84  | N | 2.70 | 0.00 | 2.70 | 92  | O | 54  | H | 1.80 | 0.00 | 1.80 | 82  | O | 44  | N | 2.70 | 0.00 | 2.70 |
| 84  | O | 46  | H | 1.80 | 0.00 | 1.80 | 92  | O | 54  | N | 2.70 | 0.00 | 2.70 | 82  | O | 44  | H | 1.80 | 0.00 | 1.80 |
| 84  | O | 46  | N | 2.70 | 0.00 | 2.70 | 54  | O | 94  | H | 1.80 | 0.00 | 1.80 | 82  | O | 44  | N | 2.70 | 0.00 | 2.70 |
| 119 | O | 81  | H | 1.80 | 0.00 | 1.80 | 54  | O | 94  | N | 2.70 | 0.00 | 2.70 | 44  | O | 84  | H | 1.80 | 0.00 | 1.80 |
| 119 | O | 81  | N | 2.70 | 0.00 | 2.70 | 94  | O | 56  | H | 1.80 | 0.00 | 1.80 | 44  | O | 84  | N | 2.70 | 0.00 | 2.70 |
| 81  | O | 121 | H | 1.80 | 0.00 | 1.80 | 94  | O | 56  | N | 2.70 | 0.00 | 2.70 | 84  | O | 46  | H | 1.80 | 0.00 | 1.80 |
| 81  | O | 121 | N | 2.70 | 0.00 | 2.70 | 56  | O | 96  | H | 1.80 | 0.00 | 1.80 | 84  | O | 46  | N | 2.70 | 0.00 | 2.70 |
| 121 | O | 83  | H | 1.80 | 0.00 | 1.80 | 56  | O | 96  | N | 2.70 | 0.00 | 2.70 | 119 | O | 81  | H | 1.80 | 0.00 | 1.80 |
| 121 | O | 83  | N | 2.70 | 0.00 | 2.70 | 129 | O | 91  | H | 1.80 | 0.00 | 1.80 | 119 | O | 81  | N | 2.70 | 0.00 | 2.70 |
| 121 | O | 83  | H | 1.80 | 0.00 | 1.80 | 129 | O | 91  | N | 2.70 | 0.00 | 2.70 | 81  | O | 121 | H | 1.80 | 0.00 | 1.80 |
| 121 | O | 83  | N | 2.70 | 0.00 | 2.70 | 91  | O | 131 | H | 1.80 | 0.00 | 1.80 | 81  | O | 121 | N | 2.70 | 0.00 | 2.70 |
| 83  | O | 123 | H | 1.80 | 0.00 | 1.80 | 91  | O | 131 | N | 2.70 | 0.00 | 2.70 | 121 | O | 83  | H | 1.80 | 0.00 | 1.80 |
| 83  | O | 123 | N | 2.70 | 0.00 | 2.70 | 131 | O | 93  | H | 1.80 | 0.00 | 1.80 | 121 | O | 83  | N | 2.70 | 0.00 | 2.70 |
| 123 | O | 85  | H | 1.80 | 0.00 | 1.80 | 131 | O | 93  | N | 2.70 | 0.00 | 2.70 | 121 | O | 83  | H | 1.80 | 0.00 | 1.80 |
| 123 | O | 85  | N | 2.70 | 0.00 | 2.70 | 93  | O | 133 | H | 1.80 | 0.00 | 1.80 | 121 | O | 83  | N | 2.70 | 0.00 | 2.70 |
| 158 | O | 120 | H | 1.80 | 0.00 | 1.80 | 93  | O | 133 | N | 2.70 | 0.00 | 2.70 | 83  | O | 123 | H | 1.80 | 0.00 | 1.80 |
| 158 | O | 120 | N | 2.70 | 0.00 | 2.70 | 133 | O | 95  | H | 1.80 | 0.00 | 1.80 | 83  | O | 123 | N | 2.70 | 0.00 | 2.70 |
| 120 | O | 160 | H | 1.80 | 0.00 | 1.80 | 133 | O | 95  | N | 2.70 | 0.00 | 2.70 | 123 | O | 85  | H | 1.80 | 0.00 | 1.80 |
| 120 | O | 160 | N | 2.70 | 0.00 | 2.70 | 95  | O | 135 | H | 1.80 | 0.00 | 1.80 | 123 | O | 85  | N | 2.70 | 0.00 | 2.70 |
| 160 | O | 122 | H | 1.80 | 0.00 | 1.80 | 95  | O | 135 | N | 2.70 | 0.00 | 2.70 | 158 | O | 120 | H | 1.80 | 0.00 | 1.80 |
| 160 | O | 122 | N | 2.70 | 0.00 | 2.70 | 168 | O | 130 | H | 1.80 | 0.00 | 1.80 | 158 | O | 120 | N | 2.70 | 0.00 | 2.70 |
| 160 | O | 122 | H | 1.80 | 0.00 | 1.80 | 168 | O | 130 | N | 2.70 | 0.00 | 2.70 | 120 | O | 160 | H | 1.80 | 0.00 | 1.80 |
| 160 | O | 122 | N | 2.70 | 0.00 | 2.70 | 130 | O | 170 | H | 1.80 | 0.00 | 1.80 | 120 | O | 160 | N | 2.70 | 0.00 | 2.70 |
| 160 | O | 122 | H | 1.80 | 0.00 | 1.80 | 130 | O | 170 | N | 2.70 | 0.00 | 2.70 | 160 | O | 122 | H | 1.80 | 0.00 | 1.80 |
| 160 | O | 122 | N | 2.70 | 0.00 | 2.70 | 170 | O | 132 | H | 1.80 | 0.00 | 1.80 | 160 | O | 122 | N | 2.70 | 0.00 | 2.70 |
| 122 | O | 162 | H | 1.80 | 0.00 | 1.80 | 170 | O | 132 | N | 2.70 | 0.00 | 2.70 | 160 | O | 122 | H | 1.80 | 0.00 | 1.80 |
| 122 | O | 162 | N | 2.70 | 0.00 | 2.70 | 132 | O | 172 | H | 1.80 | 0.00 | 1.80 | 160 | O | 122 | N | 2.70 | 0.00 | 2.70 |
| 162 | O | 124 | H | 1.80 | 0.00 | 1.80 | 172 | O | 172 | N | 2.70 | 0.00 | 2.70 | 122 | O | 162 | H | 1.80 | 0.00 | 1.80 |
| 162 | O | 124 | N | 2.70 | 0.00 | 2.70 | 172 | O | 134 | H | 1.80 | 0.00 | 1.80 | 122 | O | 162 | N | 2.70 | 0.00 | 2.70 |
| 45  | O | 7   | H | 1.80 | 0.00 | 1.80 | 172 | O | 134 | N | 2.70 | 0.00 | 2.70 | 162 | O | 124 | H | 1.80 | 0.00 | 1.80 |
| 45  | O | 7   | N | 2.70 | 0.00 | 2.70 | 134 | O | 174 | H | 1.80 | 0.00 | 1.80 | 162 | O | 124 | N | 2.70 | 0.00 | 2.70 |
| 7   | O | 47  | H | 1.80 | 0.00 | 1.80 | 134 | O | 174 | N | 2.70 | 0.00 | 2.70 | 45  | O | 7   | H | 1.80 | 0.00 | 1.80 |
| 7   | O | 47  | N | 2.70 | 0.00 | 2.70 | 58  | O | 20  | H | 1.80 | 0.00 | 1.80 | 45  | O | 7   | N | 2.70 | 0.00 | 2.70 |
| 47  | O | 9   | H | 1.80 | 0.00 | 1.80 | 58  | O | 20  | N | 2.70 | 0.00 | 2.70 | 7   | O | 47  | H | 1.80 | 0.00 | 1.80 |
| 47  | O | 9   | N | 2.70 | 0.00 | 2.70 | 20  | O | 60  | H | 1.80 | 0.00 | 1.80 | 7   | O | 47  | N | 2.70 | 0.00 | 2.70 |
| 9   | O | 49  | H | 1.80 | 0.00 | 1.80 | 20  | O | 60  | N | 2.70 | 0.00 | 2.70 | 47  | O | 9   | H | 1.80 | 0.00 | 1.80 |
| 9   | O | 49  | N | 2.70 | 0.00 | 2.70 | 60  | O | 22  | H | 1.80 | 0.00 | 1.80 | 47  | O | 9   | N | 2.70 | 0.00 | 2.70 |
| 84  | O | 46  | H | 1.80 | 0.00 | 1.80 | 60  | O | 22  | N | 2.70 | 0.00 | 2.70 | 9   | O | 49  | H | 1.80 | 0.00 | 1.80 |
| 84  | O | 46  | N | 2.70 | 0.00 | 2.70 | 22  | O | 62  | H | 1.80 | 0.00 | 1.80 | 9   | O | 49  | N | 2.70 | 0.00 | 2.70 |
| 46  | O | 86  | H | 1.80 | 0.00 | 1.80 | 22  | O | 62  | N | 2.70 | 0.00 | 2.70 | 84  | O | 46  | H | 1.80 | 0.00 | 1.80 |
| 46  | O | 86  | N | 2.70 | 0.00 | 2.70 | 97  | O | 59  | H | 1.80 | 0.00 | 1.80 | 84  | O | 46  | N | 2.70 | 0.00 | 2.70 |
| 86  | O | 48  | H | 1.80 | 0.00 | 1.80 | 97  | O | 59  | N | 2.70 | 0.00 | 2.70 | 46  | O | 86  | H | 1.80 | 0.00 | 1.80 |
| 86  | O | 48  | N | 2.70 | 0.00 | 2.70 | 59  | O | 99  | H | 1.80 | 0.00 | 1.80 | 46  | O | 86  | N | 2.70 | 0.00 | 2.70 |
| 48  | O | 88  | H | 1.80 | 0.00 | 1.80 | 59  | O | 99  | N | 2.70 | 0.00 | 2.70 | 86  | O | 48  | H | 1.80 | 0.00 | 1.80 |
| 48  | O | 88  | N | 2.70 | 0.00 | 2.70 | 99  | O | 61  | H | 1.80 | 0.00 | 1.80 | 86  | O | 48  | N | 2.70 | 0.00 | 2.70 |
| 123 | O | 85  | H | 1.80 | 0.00 | 1.80 | 99  | O | 61  | N | 2.70 | 0.00 | 2.70 | 48  | O | 88  | H | 1.80 | 0.00 | 1.80 |
| 123 | O | 85  | N | 2.70 | 0.00 | 2.70 | 61  | O | 101 | H | 1.80 | 0.00 | 1.80 | 48  | O | 88  | N | 2.70 | 0.00 | 2.70 |
| 85  | O | 125 | H | 1.80 | 0.00 | 1.80 | 61  | O | 101 | N | 2.70 | 0.00 | 2.70 | 123 | O | 85  | H | 1.80 | 0.00 | 1.80 |
| 85  | O | 125 | N | 2.70 | 0.00 | 2.70 | 136 | O | 98  | H | 1.80 | 0.00 | 1.80 | 123 | O | 85  | N | 2.70 | 0.00 | 2.70 |
| 125 | O | 87  | H | 1.80 | 0.00 | 1.80 | 136 | O | 98  | N | 2.70 | 0.00 | 2.70 | 85  | O | 125 | H | 1.80 | 0.00 | 1.80 |
| 125 | O | 87  | N | 2.70 | 0.00 | 2.70 | 98  | O | 138 | H | 1.80 | 0.00 | 1.80 | 85  | O | 125 | N | 2.70 | 0.00 | 2.70 |
| 87  | O | 127 | H | 1.80 | 0.00 | 1.80 | 98  | O | 138 | N | 2.70 | 0.00 | 2.70 | 125 | O | 87  | H | 1.80 | 0.00 | 1.80 |
| 87  | O | 127 | N | 2.70 | 0.00 | 2.70 | 138 | O | 100 | H | 1.80 | 0.00 | 1.80 | 125 | O | 87  | N | 2.70 | 0.00 | 2.70 |
| 162 | O | 124 | H | 1.80 | 0.00 | 1.80 | 138 | O | 100 | N | 2.70 | 0.00 | 2.70 | 87  | O | 127 | H | 1.80 | 0.00 | 1.80 |
| 162 | O | 124 | N | 2.70 | 0.00 | 2.70 | 100 | O | 140 | H | 1.80 | 0.00 | 1.80 | 87  | O | 127 | N | 2.70 | 0.00 | 2.70 |
| 124 | O | 164 | H | 1.80 | 0.00 | 1.80 | 100 | O | 140 | N | 2.70 | 0.00 | 2.70 | 162 | O | 124 |   |      |      |      |





|     |   |     |   |      |      |      |
|-----|---|-----|---|------|------|------|
| 44  | O | 84  | N | 2.70 | 0.00 | 2.70 |
| 84  | O | 46  | H | 1.80 | 0.00 | 1.80 |
| 84  | O | 46  | N | 2.70 | 0.00 | 2.70 |
| 119 | O | 81  | H | 1.80 | 0.00 | 1.80 |
| 119 | O | 81  | N | 2.70 | 0.00 | 2.70 |
| 81  | O | 121 | H | 1.80 | 0.00 | 1.80 |
| 81  | O | 121 | N | 2.70 | 0.00 | 2.70 |
| 121 | O | 83  | H | 1.80 | 0.00 | 1.80 |
| 121 | O | 83  | N | 2.70 | 0.00 | 2.70 |
| 121 | O | 83  | H | 1.80 | 0.00 | 1.80 |
| 121 | O | 83  | N | 2.70 | 0.00 | 2.70 |
| 83  | O | 123 | H | 1.80 | 0.00 | 1.80 |
| 83  | O | 123 | N | 2.70 | 0.00 | 2.70 |
| 123 | O | 85  | H | 1.80 | 0.00 | 1.80 |
| 123 | O | 85  | N | 2.70 | 0.00 | 2.70 |
| 158 | O | 120 | H | 1.80 | 0.00 | 1.80 |
| 158 | O | 120 | N | 2.70 | 0.00 | 2.70 |
| 120 | O | 160 | H | 1.80 | 0.00 | 1.80 |
| 120 | O | 160 | N | 2.70 | 0.00 | 2.70 |
| 160 | O | 122 | H | 1.80 | 0.00 | 1.80 |
| 160 | O | 122 | N | 2.70 | 0.00 | 2.70 |
| 160 | O | 122 | H | 1.80 | 0.00 | 1.80 |
| 160 | O | 122 | N | 2.70 | 0.00 | 2.70 |
| 122 | O | 162 | H | 1.80 | 0.00 | 1.80 |
| 122 | O | 162 | N | 2.70 | 0.00 | 2.70 |
| 162 | O | 124 | H | 1.80 | 0.00 | 1.80 |
| 162 | O | 124 | N | 2.70 | 0.00 | 2.70 |
| 45  | O | 7   | H | 1.80 | 0.00 | 1.80 |
| 45  | O | 7   | N | 2.70 | 0.00 | 2.70 |
| 7   | O | 47  | H | 1.80 | 0.00 | 1.80 |
| 7   | O | 47  | N | 2.70 | 0.00 | 2.70 |
| 47  | O | 9   | H | 1.80 | 0.00 | 1.80 |
| 47  | O | 9   | N | 2.70 | 0.00 | 2.70 |
| 9   | O | 49  | H | 1.80 | 0.00 | 1.80 |
| 9   | O | 49  | N | 2.70 | 0.00 | 2.70 |
| 84  | O | 46  | H | 1.80 | 0.00 | 1.80 |
| 84  | O | 46  | N | 2.70 | 0.00 | 2.70 |
| 46  | O | 86  | H | 1.80 | 0.00 | 1.80 |
| 46  | O | 86  | N | 2.70 | 0.00 | 2.70 |
| 86  | O | 48  | H | 1.80 | 0.00 | 1.80 |
| 86  | O | 48  | N | 2.70 | 0.00 | 2.70 |
| 48  | O | 88  | H | 1.80 | 0.00 | 1.80 |
| 48  | O | 88  | N | 2.70 | 0.00 | 2.70 |
| 123 | O | 85  | H | 1.80 | 0.00 | 1.80 |
| 123 | O | 85  | N | 2.70 | 0.00 | 2.70 |
| 85  | O | 125 | H | 1.80 | 0.00 | 1.80 |
| 85  | O | 125 | N | 2.70 | 0.00 | 2.70 |
| 125 | O | 87  | H | 1.80 | 0.00 | 1.80 |
| 125 | O | 87  | N | 2.70 | 0.00 | 2.70 |
| 87  | O | 127 | H | 1.80 | 0.00 | 1.80 |
| 87  | O | 127 | N | 2.70 | 0.00 | 2.70 |
| 162 | O | 124 | H | 1.80 | 0.00 | 1.80 |
| 162 | O | 124 | N | 2.70 | 0.00 | 2.70 |
| 124 | O | 164 | H | 1.80 | 0.00 | 1.80 |
| 124 | O | 164 | N | 2.70 | 0.00 | 2.70 |
| 164 | O | 126 | H | 1.80 | 0.00 | 1.80 |
| 164 | O | 126 | N | 2.70 | 0.00 | 2.70 |
| 126 | O | 166 | H | 1.80 | 0.00 | 1.80 |
| 126 | O | 166 | N | 2.70 | 0.00 | 2.70 |
| 51  | O | 13  | H | 1.80 | 0.00 | 1.80 |
| 51  | O | 13  | N | 2.70 | 0.00 | 2.70 |
| 13  | O | 53  | H | 1.80 | 0.00 | 1.80 |
| 13  | O | 53  | N | 2.70 | 0.00 | 2.70 |
| 53  | O | 15  | H | 1.80 | 0.00 | 1.80 |
| 53  | O | 15  | N | 2.70 | 0.00 | 2.70 |
| 15  | O | 55  | H | 1.80 | 0.00 | 1.80 |
| 15  | O | 55  | N | 2.70 | 0.00 | 2.70 |
| 55  | O | 17  | H | 1.80 | 0.00 | 1.80 |
| 55  | O | 17  | N | 2.70 | 0.00 | 2.70 |
| 17  | O | 57  | H | 1.80 | 0.00 | 1.80 |
| 17  | O | 57  | N | 2.70 | 0.00 | 2.70 |
| 90  | O | 52  | H | 1.80 | 0.00 | 1.80 |
| 90  | O | 52  | N | 2.70 | 0.00 | 2.70 |
| 52  | O | 92  | H | 1.80 | 0.00 | 1.80 |
| 52  | O | 92  | N | 2.70 | 0.00 | 2.70 |
| 92  | O | 54  | H | 1.80 | 0.00 | 1.80 |
| 92  | O | 54  | N | 2.70 | 0.00 | 2.70 |
| 54  | O | 94  | H | 1.80 | 0.00 | 1.80 |
| 54  | O | 94  | N | 2.70 | 0.00 | 2.70 |
| 94  | O | 56  | H | 1.80 | 0.00 | 1.80 |
| 94  | O | 56  | N | 2.70 | 0.00 | 2.70 |
| 56  | O | 96  | H | 1.80 | 0.00 | 1.80 |
| 56  | O | 96  | N | 2.70 | 0.00 | 2.70 |
| 129 | O | 91  | H | 1.80 | 0.00 | 1.80 |
| 129 | O | 91  | N | 2.70 | 0.00 | 2.70 |
| 91  | O | 131 | H | 1.80 | 0.00 | 1.80 |
| 91  | O | 131 | N | 2.70 | 0.00 | 2.70 |
| 131 | O | 93  | H | 1.80 | 0.00 | 1.80 |
| 131 | O | 93  | N | 2.70 | 0.00 | 2.70 |
| 93  | O | 133 | H | 1.80 | 0.00 | 1.80 |
| 93  | O | 133 | N | 2.70 | 0.00 | 2.70 |
| 133 | O | 95  | H | 1.80 | 0.00 | 1.80 |
| 133 | O | 95  | N | 2.70 | 0.00 | 2.70 |
| 95  | O | 135 | H | 1.80 | 0.00 | 1.80 |
| 95  | O | 135 | N | 2.70 | 0.00 | 2.70 |
| 168 | O | 130 | H | 1.80 | 0.00 | 1.80 |
| 168 | O | 130 | N | 2.70 | 0.00 | 2.70 |
| 130 | O | 170 | H | 1.80 | 0.00 | 1.80 |
| 130 | O | 170 | N | 2.70 | 0.00 | 2.70 |
| 170 | O | 132 | H | 1.80 | 0.00 | 1.80 |
| 170 | O | 132 | N | 2.70 | 0.00 | 2.70 |
| 132 | O | 172 | H | 1.80 | 0.00 | 1.80 |
| 132 | O | 172 | N | 2.70 | 0.00 | 2.70 |
| 172 | O | 134 | H | 1.80 | 0.00 | 1.80 |
| 172 | O | 134 | N | 2.70 | 0.00 | 2.70 |
| 134 | O | 174 | H | 1.80 | 0.00 | 1.80 |
| 134 | O | 174 | N | 2.70 | 0.00 | 2.70 |
| 58  | O | 20  | H | 1.80 | 0.00 | 1.80 |
| 58  | O | 20  | N | 2.70 | 0.00 | 2.70 |
| 20  | O | 60  | H | 1.80 | 0.00 | 1.80 |
| 20  | O | 60  | N | 2.70 | 0.00 | 2.70 |
| 60  | O | 22  | H | 1.80 | 0.00 | 1.80 |
| 60  | O | 22  | N | 2.70 | 0.00 | 2.70 |
| 22  | O | 62  | H | 1.80 | 0.00 | 1.80 |
| 22  | O | 62  | N | 2.70 | 0.00 | 2.70 |
| 97  | O | 59  | H | 1.80 | 0.00 | 1.80 |
| 97  | O | 59  | N | 2.70 | 0.00 | 2.70 |
| 59  | O | 99  | H | 1.80 | 0.00 | 1.80 |
| 59  | O | 99  | N | 2.70 | 0.00 | 2.70 |
| 99  | O | 61  | H | 1.80 | 0.00 | 1.80 |
| 99  | O | 61  | N | 2.70 | 0.00 | 2.70 |
| 61  | O | 101 | H | 1.80 | 0.00 | 1.80 |
| 61  | O | 101 | N | 2.70 | 0.00 | 2.70 |
| 136 | O | 98  | H | 1.80 | 0.00 | 1.80 |
| 136 | O | 98  | N | 2.70 | 0.00 | 2.70 |
| 98  | O | 138 | H | 1.80 | 0.00 | 1.80 |
| 98  | O | 138 | N | 2.70 | 0.00 | 2.70 |
| 138 | O | 100 | H | 1.80 | 0.00 | 1.80 |
| 138 | O | 100 | N | 2.70 | 0.00 | 2.70 |
| 100 | O | 140 | H | 1.80 | 0.00 | 1.80 |
| 100 | O | 140 | N | 2.70 | 0.00 | 2.70 |
| 175 | O | 137 | H | 1.80 | 0.00 | 1.80 |
| 175 | O | 137 | N | 2.70 | 0.00 | 2.70 |
| 137 | O | 177 | H | 1.80 | 0.00 | 1.80 |
| 137 | O | 177 | N | 2.70 | 0.00 | 2.70 |
| 177 | O | 139 | H | 1.80 | 0.00 | 1.80 |
| 177 | O | 139 | N | 2.70 | 0.00 | 2.70 |
| 139 | O | 179 | H | 1.80 | 0.00 | 1.80 |
| 139 | O | 179 | N | 2.70 | 0.00 | 2.70 |
| 41  | O | 3   | H | 1.80 | 0.00 | 1.80 |
| 41  | O | 3   | N | 2.70 | 0.00 | 2.70 |
| 3   | O | 43  | H | 1.80 | 0.00 | 1.80 |
| 3   | O | 43  | N | 2.70 | 0.00 | 2.70 |
| 43  | O | 5   | H | 1.80 | 0.00 | 1.80 |
| 43  | O | 5   | N | 2.70 | 0.00 | 2.70 |
| 43  | O | 5   | H | 1.80 | 0.00 | 1.80 |
| 43  | O | 5   | N | 2.70 | 0.00 | 2.70 |
| 5   | O | 45  | H | 1.80 | 0.00 | 1.80 |
| 5   | O | 45  | N | 2.70 | 0.00 | 2.70 |
| 45  | O | 7   | H | 1.80 | 0.00 | 1.80 |
| 45  | O | 7   | N | 2.70 | 0.00 | 2.70 |
| 80  | O | 42  | H | 1.80 | 0.00 | 1.80 |
| 80  | O | 42  | N | 2.70 | 0.00 | 2.70 |
| 42  | O | 82  | H | 1.80 | 0.00 | 1.80 |
| 42  | O | 82  | N | 2.70 | 0.00 | 2.70 |
| 82  | O | 44  | H | 1.80 | 0.00 | 1.80 |
| 82  | O | 44  | N | 2.70 | 0.00 | 2.70 |
| 82  | O | 44  | H | 1.80 | 0.00 | 1.80 |
| 82  | O | 44  | N | 2.70 | 0.00 | 2.70 |
| 44  | O | 84  | H | 1.80 | 0.00 | 1.80 |
| 44  | O | 84  | N | 2.70 | 0.00 | 2.70 |
| 84  | O | 46  | H | 1.80 | 0.00 | 1.80 |
| 84  | O | 46  | N | 2.70 | 0.00 | 2.70 |
| 119 | O | 81  | H | 1.80 | 0.00 | 1.80 |
| 119 | O | 81  | N | 2.70 | 0.00 | 2.70 |
| 81  | O | 121 | H | 1.80 | 0.00 | 1.80 |
| 81  | O | 121 | N | 2.70 | 0.00 | 2.70 |
| 121 | O | 83  | H | 1.80 | 0.00 | 1.80 |
| 121 | O | 83  | N | 2.70 | 0.00 | 2.70 |
| 121 | O | 83  | H | 1.80 | 0.00 | 1.80 |
| 121 | O | 83  | N | 2.70 | 0.00 | 2.70 |
| 83  | O | 123 | H | 1.80 | 0.00 | 1.80 |
| 83  | O | 123 | N | 2.70 | 0.00 | 2.70 |
| 123 | O | 85  | H | 1.80 | 0.00 | 1.80 |
| 123 | O | 85  | N | 2.70 | 0.00 | 2.70 |
| 158 | O | 120 | H | 1.80 | 0.00 | 1.80 |
| 158 | O | 120 | N | 2.70 | 0.00 | 2.70 |
| 120 | O | 160 | H | 1.80 | 0.00 | 1.80 |
| 120 | O | 160 | N | 2.70 | 0.00 | 2.70 |
| 160 | O | 122 | H | 1.80 | 0.00 | 1.80 |
| 160 | O | 122 | N | 2.70 | 0.00 | 2.70 |
| 160 | O | 122 | H | 1.80 | 0.00 | 1.80 |
| 160 | O | 122 | N | 2.70 | 0.00 | 2.70 |
| 122 | O | 162 | H | 1.80 | 0.00 | 1.80 |
| 122 | O | 162 | N | 2.70 | 0.00 | 2.70 |
| 162 | O | 124 | H | 1.80 | 0.00 | 1.80 |
| 162 | O | 124 | N | 2.70 | 0.00 | 2.70 |
| 45  | O | 7   | H | 1.80 | 0.00 | 1.80 |
| 45  | O | 7   | N | 2.70 | 0.00 | 2.70 |
| 7   | O | 47  | H | 1.80 | 0.00 | 1.80 |
| 7   | O | 47  | N | 2.70 | 0.00 | 2.70 |
| 47  | O | 9   | H | 1.80 | 0.00 | 1.80 |
| 47  | O | 9   | N | 2.70 | 0.00 | 2.70 |
| 9   | O | 49  | H | 1.80 | 0.00 | 1.80 |
| 9   | O | 49  | N | 2.70 | 0.00 | 2.70 |
| 84  | O | 46  | H | 1.80 | 0.00 | 1.80 |
| 84  | O | 46  | N | 2.70 | 0.00 | 2.70 |
| 46  | O | 86  | H | 1.80 | 0.00 | 1.80 |
| 46  | O | 86  | N | 2.70 | 0.00 | 2.70 |
| 86  | O | 48  | H | 1.80 | 0.00 | 1.80 |
| 86  | O | 48  | N | 2.70 | 0.00 | 2.70 |
| 48  | O | 88  | H | 1.80 | 0.00 | 1.80 |
| 48  | O | 88  | N | 2.70 | 0.00 | 2.70 |
| 123 | O | 85  | H | 1.80 | 0.00 | 1.80 |
| 123 | O | 85  | N | 2.70 | 0.00 | 2.70 |
| 85  | O | 125 | H | 1.80 | 0.00 | 1.80 |
| 85  | O | 125 | N | 2.70 | 0.00 | 2.70 |
| 125 | O | 87  | H | 1.80 | 0.00 | 1.80 |
| 125 | O | 87  | N | 2.70 | 0.00 | 2.70 |
| 87  | O | 127 | H | 1.80 | 0.00 | 1.80 |
| 87  | O | 127 | N | 2.70 | 0.00 | 2.70 |
| 162 | O | 124 | H | 1.80 | 0.00 | 1.80 |
| 162 | O | 124 | N | 2.70 | 0.00 | 2.70 |
| 124 | O | 164 | H | 1.80 | 0.00 | 1.80 |
| 124 | O | 164 | N | 2.70 | 0.00 | 2.70 |
| 164 | O | 126 | H | 1.80 | 0.00 | 1.80 |
| 164 | O | 126 | N | 2.70 | 0.00 | 2.70 |
| 126 | O | 166 | H | 1.80 |      |      |



|     |   |     |   |      |      |      |
|-----|---|-----|---|------|------|------|
| 125 | O | 87  | N | 2.70 | 0.00 | 2.70 |
| 87  | O | 127 | H | 1.80 | 0.00 | 1.80 |
| 87  | O | 127 | N | 2.70 | 0.00 | 2.70 |
| 162 | O | 124 | H | 1.80 | 0.00 | 1.80 |
| 162 | O | 124 | N | 2.70 | 0.00 | 2.70 |
| 124 | O | 164 | H | 1.80 | 0.00 | 1.80 |
| 124 | O | 164 | N | 2.70 | 0.00 | 2.70 |
| 164 | O | 126 | H | 1.80 | 0.00 | 1.80 |
| 164 | O | 126 | N | 2.70 | 0.00 | 2.70 |
| 126 | O | 166 | H | 1.80 | 0.00 | 1.80 |
| 126 | O | 166 | N | 2.70 | 0.00 | 2.70 |
| 51  | O | 13  | H | 1.80 | 0.00 | 1.80 |
| 51  | O | 13  | N | 2.70 | 0.00 | 2.70 |
| 13  | O | 53  | H | 1.80 | 0.00 | 1.80 |
| 13  | O | 53  | N | 2.70 | 0.00 | 2.70 |
| 53  | O | 15  | H | 1.80 | 0.00 | 1.80 |
| 53  | O | 15  | N | 2.70 | 0.00 | 2.70 |
| 15  | O | 55  | H | 1.80 | 0.00 | 1.80 |
| 15  | O | 55  | N | 2.70 | 0.00 | 2.70 |
| 55  | O | 17  | H | 1.80 | 0.00 | 1.80 |
| 55  | O | 17  | N | 2.70 | 0.00 | 2.70 |
| 17  | O | 57  | H | 1.80 | 0.00 | 1.80 |
| 17  | O | 57  | N | 2.70 | 0.00 | 2.70 |
| 90  | O | 52  | H | 1.80 | 0.00 | 1.80 |
| 90  | O | 52  | N | 2.70 | 0.00 | 2.70 |
| 52  | O | 92  | H | 1.80 | 0.00 | 1.80 |
| 52  | O | 92  | N | 2.70 | 0.00 | 2.70 |
| 92  | O | 54  | H | 1.80 | 0.00 | 1.80 |
| 92  | O | 54  | N | 2.70 | 0.00 | 2.70 |
| 54  | O | 94  | H | 1.80 | 0.00 | 1.80 |
| 54  | O | 94  | N | 2.70 | 0.00 | 2.70 |
| 94  | O | 56  | H | 1.80 | 0.00 | 1.80 |
| 94  | O | 56  | N | 2.70 | 0.00 | 2.70 |
| 56  | O | 96  | H | 1.80 | 0.00 | 1.80 |
| 56  | O | 96  | N | 2.70 | 0.00 | 2.70 |
| 129 | O | 91  | H | 1.80 | 0.00 | 1.80 |
| 129 | O | 91  | N | 2.70 | 0.00 | 2.70 |
| 91  | O | 131 | H | 1.80 | 0.00 | 1.80 |
| 91  | O | 131 | N | 2.70 | 0.00 | 2.70 |
| 131 | O | 93  | H | 1.80 | 0.00 | 1.80 |
| 131 | O | 93  | N | 2.70 | 0.00 | 2.70 |
| 93  | O | 133 | H | 1.80 | 0.00 | 1.80 |
| 93  | O | 133 | N | 2.70 | 0.00 | 2.70 |
| 133 | O | 95  | H | 1.80 | 0.00 | 1.80 |
| 133 | O | 95  | N | 2.70 | 0.00 | 2.70 |
| 95  | O | 135 | H | 1.80 | 0.00 | 1.80 |
| 95  | O | 135 | N | 2.70 | 0.00 | 2.70 |
| 168 | O | 130 | H | 1.80 | 0.00 | 1.80 |
| 168 | O | 130 | N | 2.70 | 0.00 | 2.70 |
| 130 | O | 170 | H | 1.80 | 0.00 | 1.80 |
| 130 | O | 170 | N | 2.70 | 0.00 | 2.70 |
| 170 | O | 132 | H | 1.80 | 0.00 | 1.80 |
| 170 | O | 132 | N | 2.70 | 0.00 | 2.70 |
| 132 | O | 172 | H | 1.80 | 0.00 | 1.80 |
| 132 | O | 172 | N | 2.70 | 0.00 | 2.70 |
| 172 | O | 134 | H | 1.80 | 0.00 | 1.80 |
| 172 | O | 134 | N | 2.70 | 0.00 | 2.70 |
| 134 | O | 174 | H | 1.80 | 0.00 | 1.80 |
| 134 | O | 174 | N | 2.70 | 0.00 | 2.70 |
| 58  | O | 20  | H | 1.80 | 0.00 | 1.80 |
| 58  | O | 20  | N | 2.70 | 0.00 | 2.70 |
| 20  | O | 60  | H | 1.80 | 0.00 | 1.80 |
| 20  | O | 60  | N | 2.70 | 0.00 | 2.70 |
| 60  | O | 22  | H | 1.80 | 0.00 | 1.80 |
| 60  | O | 22  | N | 2.70 | 0.00 | 2.70 |
| 22  | O | 62  | H | 1.80 | 0.00 | 1.80 |
| 22  | O | 62  | N | 2.70 | 0.00 | 2.70 |
| 97  | O | 59  | H | 1.80 | 0.00 | 1.80 |
| 97  | O | 59  | N | 2.70 | 0.00 | 2.70 |
| 59  | O | 99  | H | 1.80 | 0.00 | 1.80 |
| 59  | O | 99  | N | 2.70 | 0.00 | 2.70 |
| 99  | O | 61  | H | 1.80 | 0.00 | 1.80 |
| 99  | O | 61  | N | 2.70 | 0.00 | 2.70 |
| 61  | O | 101 | H | 1.80 | 0.00 | 1.80 |
| 61  | O | 101 | N | 2.70 | 0.00 | 2.70 |
| 136 | O | 98  | H | 1.80 | 0.00 | 1.80 |
| 136 | O | 98  | N | 2.70 | 0.00 | 2.70 |
| 98  | O | 138 | H | 1.80 | 0.00 | 1.80 |
| 98  | O | 138 | N | 2.70 | 0.00 | 2.70 |
| 138 | O | 100 | H | 1.80 | 0.00 | 1.80 |
| 138 | O | 100 | N | 2.70 | 0.00 | 2.70 |
| 100 | O | 140 | H | 1.80 | 0.00 | 1.80 |
| 100 | O | 140 | N | 2.70 | 0.00 | 2.70 |
| 175 | O | 137 | H | 1.80 | 0.00 | 1.80 |
| 175 | O | 137 | N | 2.70 | 0.00 | 2.70 |
| 137 | O | 177 | H | 1.80 | 0.00 | 1.80 |
| 137 | O | 177 | N | 2.70 | 0.00 | 2.70 |
| 177 | O | 139 | H | 1.80 | 0.00 | 1.80 |

|     |   |     |   |      |      |      |
|-----|---|-----|---|------|------|------|
| 177 | O | 139 | N | 2.70 | 0.00 | 2.70 |
| 139 | O | 179 | H | 1.80 | 0.00 | 1.80 |
| 139 | O | 179 | N | 2.70 | 0.00 | 2.70 |
| 41  | O | 3   | H | 1.80 | 0.00 | 1.80 |
| 41  | O | 3   | N | 2.70 | 0.00 | 2.70 |
| 3   | O | 43  | H | 1.80 | 0.00 | 1.80 |
| 3   | O | 43  | N | 2.70 | 0.00 | 2.70 |
| 43  | O | 5   | H | 1.80 | 0.00 | 1.80 |
| 43  | O | 5   | N | 2.70 | 0.00 | 2.70 |
| 43  | O | 5   | H | 1.80 | 0.00 | 1.80 |
| 43  | O | 5   | N | 2.70 | 0.00 | 2.70 |
| 5   | O | 45  | H | 1.80 | 0.00 | 1.80 |
| 5   | O | 45  | N | 2.70 | 0.00 | 2.70 |
| 45  | O | 7   | H | 1.80 | 0.00 | 1.80 |
| 45  | O | 7   | N | 2.70 | 0.00 | 2.70 |
| 80  | O | 42  | H | 1.80 | 0.00 | 1.80 |
| 80  | O | 42  | N | 2.70 | 0.00 | 2.70 |
| 42  | O | 82  | H | 1.80 | 0.00 | 1.80 |
| 42  | O | 82  | N | 2.70 | 0.00 | 2.70 |
| 82  | O | 44  | H | 1.80 | 0.00 | 1.80 |
| 82  | O | 44  | N | 2.70 | 0.00 | 2.70 |
| 82  | O | 44  | H | 1.80 | 0.00 | 1.80 |
| 82  | O | 44  | N | 2.70 | 0.00 | 2.70 |
| 44  | O | 84  | H | 1.80 | 0.00 | 1.80 |
| 44  | O | 84  | N | 2.70 | 0.00 | 2.70 |
| 84  | O | 46  | H | 1.80 | 0.00 | 1.80 |
| 84  | O | 46  | N | 2.70 | 0.00 | 2.70 |
| 119 | O | 81  | H | 1.80 | 0.00 | 1.80 |
| 119 | O | 81  | N | 2.70 | 0.00 | 2.70 |
| 81  | O | 121 | H | 1.80 | 0.00 | 1.80 |
| 81  | O | 121 | N | 2.70 | 0.00 | 2.70 |
| 121 | O | 83  | H | 1.80 | 0.00 | 1.80 |
| 121 | O | 83  | N | 2.70 | 0.00 | 2.70 |
| 121 | O | 83  | H | 1.80 | 0.00 | 1.80 |
| 121 | O | 83  | N | 2.70 | 0.00 | 2.70 |
| 83  | O | 123 | H | 1.80 | 0.00 | 1.80 |
| 83  | O | 123 | N | 2.70 | 0.00 | 2.70 |
| 123 | O | 85  | H | 1.80 | 0.00 | 1.80 |
| 123 | O | 85  | N | 2.70 | 0.00 | 2.70 |
| 158 | O | 120 | H | 1.80 | 0.00 | 1.80 |
| 158 | O | 120 | N | 2.70 | 0.00 | 2.70 |
| 120 | O | 160 | H | 1.80 | 0.00 | 1.80 |
| 120 | O | 160 | N | 2.70 | 0.00 | 2.70 |
| 160 | O | 122 | H | 1.80 | 0.00 | 1.80 |
| 160 | O | 122 | N | 2.70 | 0.00 | 2.70 |
| 160 | O | 122 | H | 1.80 | 0.00 | 1.80 |
| 160 | O | 122 | N | 2.70 | 0.00 | 2.70 |
| 160 | O | 122 | N | 2.70 | 0.00 | 2.70 |
| 122 | O | 162 | H | 1.80 | 0.00 | 1.80 |
| 122 | O | 162 | N | 2.70 | 0.00 | 2.70 |
| 162 | O | 124 | H | 1.80 | 0.00 | 1.80 |
| 162 | O | 124 | N | 2.70 | 0.00 | 2.70 |
| 45  | O | 7   | H | 1.80 | 0.00 | 1.80 |
| 45  | O | 7   | N | 2.70 | 0.00 | 2.70 |
| 7   | O | 47  | H | 1.80 | 0.00 | 1.80 |
| 7   | O | 47  | N | 2.70 | 0.00 | 2.70 |
| 47  | O | 9   | H | 1.80 | 0.00 | 1.80 |
| 47  | O | 9   | N | 2.70 | 0.00 | 2.70 |
| 9   | O | 49  | H | 1.80 | 0.00 | 1.80 |
| 9   | O | 49  | N | 2.70 | 0.00 | 2.70 |
| 84  | O | 46  | H | 1.80 | 0.00 | 1.80 |
| 84  | O | 46  | N | 2.70 | 0.00 | 2.70 |
| 46  | O | 86  | H | 1.80 | 0.00 | 1.80 |
| 46  | O | 86  | N | 2.70 | 0.00 | 2.70 |
| 86  | O | 48  | H | 1.80 | 0.00 | 1.80 |
| 86  | O | 48  | N | 2.70 | 0.00 | 2.70 |
| 48  | O | 88  | H | 1.80 | 0.00 | 1.80 |
| 48  | O | 88  | N | 2.70 | 0.00 | 2.70 |
| 123 | O | 85  | H | 1.80 | 0.00 | 1.80 |
| 123 | O | 85  | N | 2.70 | 0.00 | 2.70 |
| 85  | O | 125 | H | 1.80 | 0.00 | 1.80 |
| 85  | O | 125 | N | 2.70 | 0.00 | 2.70 |
| 125 | O | 87  | H | 1.80 | 0.00 | 1.80 |
| 125 | O | 87  | N | 2.70 | 0.00 | 2.70 |
| 87  | O | 127 | H | 1.80 | 0.00 | 1.80 |
| 87  | O | 127 | N | 2.70 | 0.00 | 2.70 |
| 162 | O | 124 | H | 1.80 | 0.00 | 1.80 |
| 162 | O | 124 | N | 2.70 | 0.00 | 2.70 |
| 124 | O | 164 | H | 1.80 | 0.00 | 1.80 |
| 124 | O | 164 | N | 2.70 | 0.00 | 2.70 |
| 164 | O | 126 | H | 1.80 | 0.00 | 1.80 |
| 164 | O | 126 | N | 2.70 | 0.00 | 2.70 |
| 126 | O | 166 | H | 1.80 | 0.00 | 1.80 |
| 126 | O | 166 | N | 2.70 | 0.00 | 2.70 |
| 51  | O | 13  | H | 1.80 | 0.00 | 1.80 |
| 51  | O | 13  | N | 2.70 | 0.00 | 2.70 |
| 13  | O | 53  | H | 1.80 | 0.00 | 1.80 |
| 13  | O | 53  | N | 2.70 | 0.00 | 2.70 |
| 53  | O | 15  | H | 1.80 | 0.00 | 1.80 |

|     |   |     |   |      |      |      |
|-----|---|-----|---|------|------|------|
| 53  | O | 15  | N | 2.70 | 0.00 | 2.70 |
| 15  | O | 55  | H | 1.80 | 0.00 | 1.80 |
| 15  | O | 55  | N | 2.70 | 0.00 | 2.70 |
| 55  | O | 17  | H | 1.80 | 0.00 | 1.80 |
| 55  | O | 17  | N | 2.70 | 0.00 | 2.70 |
| 17  | O | 57  | H | 1.80 | 0.00 | 1.80 |
| 17  | O | 57  | N | 2.70 | 0.00 | 2.70 |
| 90  | O | 52  | H | 1.80 | 0.00 | 1.80 |
| 90  | O | 52  | N | 2.70 | 0.00 | 2.70 |
| 52  | O | 92  | H | 1.80 | 0.00 | 1.80 |
| 52  | O | 92  | N | 2.70 | 0.00 | 2.70 |
| 92  | O | 54  | H | 1.80 | 0.00 | 1.80 |
| 92  | O | 54  | N | 2.70 | 0.00 | 2.70 |
| 54  | O | 94  | H | 1.80 | 0.00 | 1.80 |
| 54  | O | 94  | N | 2.70 | 0.00 | 2.70 |
| 94  | O | 56  | H | 1.80 | 0.00 | 1.80 |
| 94  | O | 56  | N | 2.70 | 0.00 | 2.70 |
| 56  | O | 96  | H | 1.80 | 0.00 | 1.80 |
| 56  | O | 96  | N | 2.70 | 0.00 | 2.70 |
| 129 | O | 91  | H | 1.80 | 0.00 | 1.80 |
| 129 | O | 91  | N | 2.70 | 0.00 | 2.70 |
| 91  | O | 131 | H | 1.80 | 0.00 | 1.80 |
| 91  | O | 131 | N | 2.70 | 0.00 | 2.70 |
| 131 | O | 93  | H | 1.80 | 0.00 | 1.80 |
| 131 | O | 93  | N | 2.70 | 0.00 | 2.70 |
| 93  | O | 133 | H | 1.80 | 0.00 | 1.80 |
| 93  | O | 133 | N | 2.70 | 0.00 | 2.70 |
| 133 | O | 95  | H | 1.80 | 0.00 | 1.80 |
| 133 | O | 95  | N | 2.70 | 0.00 | 2.70 |
| 95  | O | 135 | H | 1.80 | 0.00 | 1.80 |
| 95  | O | 135 | N | 2.70 | 0.00 | 2.70 |
| 168 | O | 130 | H | 1.80 | 0.00 | 1.80 |
| 168 | O | 130 | N | 2.70 | 0.00 | 2.70 |
| 130 | O | 170 | H | 1.80 | 0.00 | 1.80 |
| 130 | O | 170 | N | 2.70 | 0.00 | 2.70 |
| 170 | O | 132 | H | 1.80 | 0.00 | 1.80 |
| 170 | O | 132 | N | 2.70 | 0.00 | 2.70 |
| 132 | O | 172 | H | 1.80 | 0.00 | 1.80 |
| 132 | O | 172 | N | 2.70 | 0.00 | 2.70 |
| 172 | O | 134 | H | 1.80 | 0.00 | 1.80 |
| 172 | O | 134 | N | 2.70 | 0.00 | 2.70 |
| 134 | O | 174 | H | 1.80 | 0.00 | 1.80 |
| 134 | O | 174 | N | 2.70 | 0.00 | 2.70 |
| 58  | O | 20  | H |      |      |      |





|     |    |     |   |      |      |      |     |    |     |     |       |      |       |     |    |     |    |       |      |       |
|-----|----|-----|---|------|------|------|-----|----|-----|-----|-------|------|-------|-----|----|-----|----|-------|------|-------|
| 171 | HA | 172 | H | 2.50 | 0.00 | 2.50 | 60  | HA | 61  | H   | 2.50  | 0.00 | 2.50  | 43  | CB | 82  | CB | 4.80  | 0.00 | 4.80  |
| 172 | HA | 173 | H | 2.50 | 0.00 | 2.50 | 61  | HA | 62  | H   | 2.50  | 0.00 | 2.50  | 82  | CB | 121 | CB | 4.80  | 0.00 | 4.80  |
| 173 | HA | 174 | H | 2.50 | 0.00 | 2.50 | 98  | HA | 99  | H   | 2.50  | 0.00 | 2.50  | 121 | CB | 160 | CB | 4.80  | 0.00 | 4.80  |
| 174 | HA | 175 | H | 2.50 | 0.00 | 2.50 | 99  | HA | 100 | H   | 2.50  | 0.00 | 2.50  | 4   | CB | 82  | CB | 9.60  | 0.00 | 9.60  |
| 20  | HA | 21  | H | 2.50 | 0.00 | 2.50 | 100 | HA | 101 | H   | 2.50  | 0.00 | 2.50  | 4   | CB | 121 | CB | 14.40 | 0.00 | 14.40 |
| 21  | HA | 22  | H | 2.50 | 0.00 | 2.50 | 137 | HA | 138 | H   | 2.50  | 0.00 | 2.50  | 4   | CB | 160 | CB | 19.20 | 0.00 | 19.20 |
| 22  | HA | 23  | H | 2.50 | 0.00 | 2.50 | 138 | HA | 139 | H   | 2.50  | 0.00 | 2.50  | 5   | N  | 44  | N  | 4.80  | 0.00 | 4.80  |
| 59  | HA | 60  | H | 2.50 | 0.00 | 2.50 | 139 | HA | 140 | H   | 2.50  | 0.00 | 2.50  | 44  | N  | 83  | N  | 4.80  | 0.00 | 4.80  |
| 60  | HA | 61  | H | 2.50 | 0.00 | 2.50 | 176 | HA | 177 | H   | 2.50  | 0.00 | 2.50  | 83  | N  | 122 | N  | 4.80  | 0.00 | 4.80  |
| 61  | HA | 62  | H | 2.50 | 0.00 | 2.50 | 177 | HA | 178 | H   | 2.50  | 0.00 | 2.50  | 122 | N  | 161 | N  | 4.80  | 0.00 | 4.80  |
| 98  | HA | 99  | H | 2.50 | 0.00 | 2.50 | 178 | HA | 179 | H   | 2.50  | 0.00 | 2.50  | 5   | N  | 83  | N  | 9.60  | 0.00 | 9.60  |
| 99  | HA | 100 | H | 2.50 | 0.00 | 2.50 | 1   | N  | 40  | N   | 4.80  | 0.00 | 4.80  | 5   | N  | 122 | N  | 14.40 | 0.00 | 14.40 |
| 100 | HA | 101 | H | 2.50 | 0.00 | 2.50 | 40  | N  | 79  | N   | 4.80  | 0.00 | 4.80  | 5   | N  | 161 | N  | 19.20 | 0.00 | 19.20 |
| 137 | HA | 138 | H | 2.50 | 0.00 | 2.50 | 79  | N  | 118 | N   | 4.80  | 0.00 | 4.80  | 5   | CA | 44  | CA | 4.80  | 0.00 | 4.80  |
| 138 | HA | 139 | H | 2.50 | 0.00 | 2.50 | 118 | N  | 157 | N   | 4.80  | 0.00 | 4.80  | 44  | CA | 83  | CA | 4.80  | 0.00 | 4.80  |
| 139 | HA | 140 | H | 2.50 | 0.00 | 2.50 | 1   | N  | 79  | N   | 9.60  | 0.00 | 9.60  | 83  | CA | 122 | CA | 4.80  | 0.00 | 4.80  |
| 176 | HA | 177 | H | 2.50 | 0.00 | 2.50 | 1   | N  | 118 | N   | 14.40 | 0.00 | 14.40 | 122 | CA | 161 | CA | 4.80  | 0.00 | 4.80  |
| 177 | HA | 178 | H | 2.50 | 0.00 | 2.50 | 1   | N  | 157 | N   | 19.20 | 0.00 | 19.20 | 5   | CA | 83  | CA | 9.60  | 0.00 | 9.60  |
| 178 | HA | 179 | H | 2.50 | 0.00 | 2.50 | 1   | CA | 40  | CA  | 4.80  | 0.00 | 4.80  | 5   | CA | 122 | CA | 14.40 | 0.00 | 14.40 |
| 3   | HA | 4   | H | 2.50 | 0.00 | 2.50 | 40  | CA | 79  | CA  | 4.80  | 0.00 | 4.80  | 5   | CA | 161 | CA | 19.20 | 0.00 | 19.20 |
| 4   | HA | 5   | H | 2.50 | 0.00 | 2.50 | 79  | CA | 118 | CA  | 4.80  | 0.00 | 4.80  | 5   | CB | 83  | CB | 9.60  | 0.00 | 9.60  |
| 5   | HA | 6   | H | 2.50 | 0.00 | 2.50 | 118 | CA | 157 | CA  | 4.80  | 0.00 | 4.80  | 5   | CB | 161 | CB | 19.20 | 0.00 | 19.20 |
| 42  | HA | 43  | H | 2.50 | 0.00 | 2.50 | 1   | CA | 79  | CA  | 9.60  | 0.00 | 9.60  | 6   | N  | 45  | N  | 4.80  | 0.00 | 4.80  |
| 43  | HA | 44  | H | 2.50 | 0.00 | 2.50 | 1   | CA | 118 | CA  | 14.40 | 0.00 | 14.40 | 45  | N  | 84  | N  | 4.80  | 0.00 | 4.80  |
| 44  | HA | 45  | H | 2.50 | 0.00 | 2.50 | 1   | CA | 157 | CA  | 19.20 | 0.00 | 19.20 | 84  | N  | 123 | N  | 4.80  | 0.00 | 4.80  |
| 81  | HA | 82  | H | 2.50 | 0.00 | 2.50 | 2   | N  | 41  | N   | 4.80  | 0.00 | 4.80  | 123 | N  | 162 | N  | 4.80  | 0.00 | 4.80  |
| 82  | HA | 83  | H | 2.50 | 0.00 | 2.50 | 41  | N  | 80  | N   | 4.80  | 0.00 | 4.80  | 6   | N  | 84  | N  | 9.60  | 0.00 | 9.60  |
| 83  | HA | 84  | H | 2.50 | 0.00 | 2.50 | 80  | N  | 119 | N   | 4.80  | 0.00 | 4.80  | 6   | N  | 123 | N  | 14.40 | 0.00 | 14.40 |
| 120 | HA | 121 | H | 2.50 | 0.00 | 2.50 | 119 | N  | 158 | N   | 4.80  | 0.00 | 4.80  | 6   | N  | 162 | N  | 19.20 | 0.00 | 19.20 |
| 121 | HA | 122 | H | 2.50 | 0.00 | 2.50 | 2   | N  | 80  | N   | 9.60  | 0.00 | 9.60  | 6   | CA | 45  | CA | 4.80  | 0.00 | 4.80  |
| 122 | HA | 123 | H | 2.50 | 0.00 | 2.50 | 2   | N  | 119 | N   | 14.40 | 0.00 | 14.40 | 45  | CA | 84  | CA | 4.80  | 0.00 | 4.80  |
| 159 | HA | 160 | H | 2.50 | 0.00 | 2.50 | 2   | N  | 158 | N   | 19.20 | 0.00 | 19.20 | 84  | CA | 123 | CA | 4.80  | 0.00 | 4.80  |
| 160 | HA | 161 | H | 2.50 | 0.00 | 2.50 | 2   | CA | 41  | CA  | 4.80  | 0.00 | 4.80  | 123 | CA | 162 | CA | 4.80  | 0.00 | 4.80  |
| 161 | HA | 162 | H | 2.50 | 0.00 | 2.50 | 41  | CA | 80  | CA  | 4.80  | 0.00 | 4.80  | 6   | CA | 84  | CA | 9.60  | 0.00 | 9.60  |
| 7   | HA | 8   | H | 2.50 | 0.00 | 2.50 | 80  | CA | 119 | CA  | 4.80  | 0.00 | 4.80  | 6   | CA | 123 | CA | 14.40 | 0.00 | 14.40 |
| 8   | HA | 9   | H | 2.50 | 0.00 | 2.50 | 119 | CA | 158 | CA  | 4.80  | 0.00 | 4.80  | 6   | CA | 162 | CA | 19.20 | 0.00 | 19.20 |
| 9   | HA | 10  | H | 2.50 | 0.00 | 2.50 | 2   | CA | 80  | CA  | 9.60  | 0.00 | 9.60  | 6   | CB | 84  | CB | 9.60  | 0.00 | 9.60  |
| 10  | HA | 11  | H | 2.50 | 0.00 | 2.50 | 2   | CA | 119 | CA  | 14.40 | 0.00 | 14.40 | 6   | CB | 162 | CB | 19.20 | 0.00 | 19.20 |
| 46  | HA | 47  | H | 2.50 | 0.00 | 2.50 | 2   | CA | 158 | CA  | 19.20 | 0.00 | 19.20 | 6   | CG | 84  | CG | 9.60  | 0.00 | 9.60  |
| 47  | HA | 48  | H | 2.50 | 0.00 | 2.50 | 2   | CB | 80  | CB  | 9.60  | 0.00 | 9.60  | 6   | CG | 162 | CG | 19.20 | 0.00 | 19.20 |
| 48  | HA | 49  | H | 2.50 | 0.00 | 2.50 | 2   | CB | 158 | CB  | 19.20 | 0.00 | 19.20 | 6   | CD | 84  | CD | 9.60  | 0.00 | 9.60  |
| 49  | HA | 50  | H | 2.50 | 0.00 | 2.50 | 2   | CG | 80  | CG  | 9.60  | 0.00 | 9.60  | 6   | CD | 162 | CD | 19.20 | 0.00 | 19.20 |
| 85  | HA | 86  | H | 2.50 | 0.00 | 2.50 | 2   | CG | 158 | CG  | 19.20 | 0.00 | 19.20 | 6   | CE | 84  | CE | 9.60  | 0.00 | 9.60  |
| 86  | HA | 87  | H | 2.50 | 0.00 | 2.50 | 2   | CD | 80  | CD  | 9.60  | 0.00 | 9.60  | 6   | CE | 162 | CE | 19.20 | 0.00 | 19.20 |
| 87  | HA | 88  | H | 2.50 | 0.00 | 2.50 | 2   | CD | 158 | CD  | 19.20 | 0.00 | 19.20 | 7   | N  | 46  | N  | 4.80  | 0.00 | 4.80  |
| 88  | HA | 89  | H | 2.50 | 0.00 | 2.50 | 3   | N  | 42  | N   | 4.80  | 0.00 | 4.80  | 46  | N  | 85  | N  | 4.80  | 0.00 | 4.80  |
| 124 | HA | 125 | H | 2.50 | 0.00 | 2.50 | 42  | N  | 81  | N   | 4.80  | 0.00 | 4.80  | 85  | N  | 124 | N  | 4.80  | 0.00 | 4.80  |
| 125 | HA | 126 | H | 2.50 | 0.00 | 2.50 | 81  | N  | 120 | N   | 4.80  | 0.00 | 4.80  | 124 | N  | 163 | N  | 4.80  | 0.00 | 4.80  |
| 126 | HA | 127 | H | 2.50 | 0.00 | 2.50 | 120 | N  | 159 | N   | 4.80  | 0.00 | 4.80  | 7   | N  | 85  | N  | 9.60  | 0.00 | 9.60  |
| 127 | HA | 128 | H | 2.50 | 0.00 | 2.50 | 3   | N  | 81  | N   | 9.60  | 0.00 | 9.60  | 7   | N  | 124 | N  | 14.40 | 0.00 | 14.40 |
| 163 | HA | 164 | H | 2.50 | 0.00 | 2.50 | 3   | N  | 120 | N   | 14.40 | 0.00 | 14.40 | 7   | N  | 163 | N  | 19.20 | 0.00 | 19.20 |
| 164 | HA | 165 | H | 2.50 | 0.00 | 2.50 | 3   | N  | 159 | N   | 19.20 | 0.00 | 19.20 | 7   | CA | 46  | CA | 4.80  | 0.00 | 4.80  |
| 165 | HA | 166 | H | 2.50 | 0.00 | 2.50 | 3   | CA | 42  | CA  | 4.80  | 0.00 | 4.80  | 46  | CA | 85  | CA | 4.80  | 0.00 | 4.80  |
| 166 | HA | 167 | H | 2.50 | 0.00 | 2.50 | 42  | CA | 81  | CA  | 4.80  | 0.00 | 4.80  | 85  | CA | 124 | CA | 4.80  | 0.00 | 4.80  |
| 13  | HA | 14  | H | 2.50 | 0.00 | 2.50 | 81  | CA | 120 | CA  | 4.80  | 0.00 | 4.80  | 124 | CA | 163 | CA | 4.80  | 0.00 | 4.80  |
| 14  | HA | 15  | H | 2.50 | 0.00 | 2.50 | 120 | CA | 159 | CA  | 4.80  | 0.00 | 4.80  | 7   | CA | 85  | CA | 9.60  | 0.00 | 9.60  |
| 15  | HA | 16  | H | 2.50 | 0.00 | 2.50 | 3   | CA | 81  | CA  | 9.60  | 0.00 | 9.60  | 7   | CA | 124 | CA | 14.40 | 0.00 | 14.40 |
| 16  | HA | 17  | H | 2.50 | 0.00 | 2.50 | 3   | CA | 120 | CA  | 14.40 | 0.00 | 14.40 | 7   | CA | 163 | CA | 19.20 | 0.00 | 19.20 |
| 17  | HA | 18  | H | 2.50 | 0.00 | 2.50 | 3   | CA | 159 | CA  | 19.20 | 0.00 | 19.20 | 7   | CB | 85  | CB | 9.60  | 0.00 | 9.60  |
| 18  | HA | 19  | H | 2.50 | 0.00 | 2.50 | 3   | CB | 42  | CB  | 4.80  | 0.00 | 4.80  | 7   | CB | 163 | CB | 19.20 | 0.00 | 19.20 |
| 52  | HA | 53  | H | 2.50 | 0.00 | 2.50 | 42  | CB | 81  | CB  | 4.80  | 0.00 | 4.80  | 7   | CG | 85  | CG | 9.60  | 0.00 | 9.60  |
| 53  | HA | 54  | H | 2.50 | 0.00 | 2.50 | 81  | CB | 120 | CB  | 4.80  | 0.00 | 4.80  | 7   | CG | 163 | CG | 19.20 | 0.00 | 19.20 |
| 54  | HA | 55  | H | 2.50 | 0.00 | 2.50 | 120 | CB | 159 | CB  | 4.80  | 0.00 | 4.80  | 8   | N  | 47  | N  | 4.80  | 0.00 | 4.80  |
| 55  | HA | 56  | H | 2.50 | 0.00 | 2.50 | 3   | CB | 81  | CB  | 9.60  | 0.00 | 9.60  | 47  | N  | 86  | N  | 4.80  | 0.00 | 4.80  |
| 56  | HA | 57  | H | 2.50 | 0.00 | 2.50 | 3   | CB | 120 | CB  | 14.40 | 0.00 | 14.40 | 86  | N  | 125 | N  | 4.80  | 0.00 | 4.80  |
| 57  | HA | 58  | H | 2.50 | 0.00 | 2.50 | 3   | CB | 159 | CB  | 19.20 | 0.00 | 19.20 | 125 | N  | 164 | N  | 4.80  | 0.00 | 4.80  |
| 91  | HA | 92  | H | 2.50 | 0.00 | 2.50 | 3   | CG | 42  | CG  | 4.80  | 0.00 | 4.80  | 8   | N  | 86  | N  | 9.60  | 0.00 | 9.60  |
| 92  | HA | 93  | H | 2.50 | 0.00 | 2.50 | 42  | CG | 81  | CG  | 4.80  | 0.00 | 4.80  | 8   | N  | 125 | N  | 14.40 | 0.00 | 14.40 |
| 93  | HA | 94  | H | 2.50 | 0.00 | 2.50 | 81  | CG | 120 | CG  | 4.80  | 0.00 | 4.80  | 8   | N  | 164 | N  | 19.20 | 0.00 | 19.20 |
| 94  | HA | 95  | H | 2.50 | 0.00 | 2.50 | 120 | CG | 159 | CG  | 4.80  | 0.00 | 4.80  | 8   | CA | 47  | CA | 4.80  | 0.00 | 4.80  |
| 95  | HA | 96  | H | 2.50 | 0.00 | 2.50 | 3   | CG | 81  | CG  | 9.60  | 0.00 | 9.60  | 47  | CA | 86  | CA | 4.80  | 0.00 | 4.80  |
| 96  | HA | 97  | H | 2.50 | 0.00 | 2.50 | 3   | CG | 120 | CG  | 14.40 | 0.00 | 14.40 | 86  | CA | 125 | CA | 4.80  | 0.00 | 4.80  |
| 130 | HA | 131 | H | 2.50 | 0.00 | 2.50 | 3   | CG | 159 | CG  | 19.20 | 0.00 | 19.20 | 125 | CA | 164 | CA | 4.80  | 0.00 | 4.80  |
| 131 | HA | 132 | H | 2.50 | 0.00 | 2.50 | 4   | N  | 43  | N   | 4.80  | 0.00 | 4.80  | 8   | CA | 86  | CA | 9.60  | 0.00 | 9.60  |
| 132 | HA | 133 | H | 2.50 | 0.00 | 2.50 | 43  | N  | 82  | N   | 4.80  | 0.00 | 4.80  | 8   | CA | 125 | CA | 14.40 | 0.00 | 14.40 |
| 133 | HA | 134 | H | 2.50 | 0.00 | 2.50 | 82  | N  | 121 | N</ |       |      |       |     |    |     |    |       |      |       |

|       |    |     |    |        |      |       |  |  |  |
|-------|----|-----|----|--------|------|-------|--|--|--|
| 126   | CA | 165 | CA | 4.80   | 0.00 | 4.80  |  |  |  |
| 9     | CA | 87  | CA | 9.60   | 0.00 | 9.60  |  |  |  |
| 9     | CA | 126 | CA | 14.40  | 0.00 | 14.40 |  |  |  |
| 9     | CA | 165 | CA | 19.20  | 0.00 | 19.20 |  |  |  |
| 9     | CB | 87  | CB | 9.60   | 0.00 | 9.60  |  |  |  |
| 9     | CB | 165 | CB | 19.20  | 0.00 | 19.20 |  |  |  |
| 9     | CG | 87  | CG | 9.60   | 0.00 | 9.60  |  |  |  |
| 9     | CG | 165 | CG | 19.20  | 0.00 | 19.20 |  |  |  |
| 9     | CD | 87  | CD | 9.60   | 0.00 | 9.60  |  |  |  |
| 9     | CD | 165 | CD | 19.20  | 0.00 | 19.20 |  |  |  |
| 10    | N  | 49  | N  | 4.80   | 0.00 | 4.80  |  |  |  |
| 49    | N  | 88  | N  | 4.80   | 0.00 | 4.80  |  |  |  |
| 88    | N  | 127 | N  | 4.80   | 0.00 | 4.80  |  |  |  |
| 127   | N  | 166 | N  | 4.80   | 0.00 | 4.80  |  |  |  |
| 10    | N  | 88  | N  | 9.60   | 0.00 | 9.60  |  |  |  |
| 10    | N  | 127 | N  | 14.40  | 0.00 | 14.40 |  |  |  |
| 10    | N  | 166 | N  | 19.20  | 0.00 | 19.20 |  |  |  |
| 10    | CA | 49  | CA | 4.80   | 0.00 | 4.80  |  |  |  |
| 49    | CA | 88  | CA | 4.80   | 0.00 | 4.80  |  |  |  |
| 88    | CA | 127 | CA | 4.80   | 0.00 | 4.80  |  |  |  |
| 127   | CA | 166 | CA | 4.80   | 0.00 | 4.80  |  |  |  |
| 10    | CA | 88  | CA | 9.60   | 0.00 | 9.60  |  |  |  |
| 10    | CA | 127 | CA | 14.40  | 0.00 |       |  |  |  |
| 14.40 |    |     |    |        |      |       |  |  |  |
| 10    | CA | 166 | CA | 19.20  | 0.00 |       |  |  |  |
| 19.20 |    |     |    |        |      |       |  |  |  |
| 10    | CB | 88  | CB | 9.60   | 0.00 | 9.60  |  |  |  |
| 10    | CB | 166 | CB | 19.20  | 0.00 | 19.20 |  |  |  |
| 11    | N  | 50  | N  | 4.80   | 0.00 | 4.80  |  |  |  |
| 50    | N  | 89  | N  | 4.80   | 0.00 | 4.80  |  |  |  |
| 89    | N  | 128 | N  | 4.80   | 0.00 | 4.80  |  |  |  |
| 128   | N  | 167 | N  | 4.80   | 0.00 | 4.80  |  |  |  |
| 11    | N  | 89  | N  | 9.60   | 0.00 | 9.60  |  |  |  |
| 11    | N  | 128 | N  | 14.40  | 0.00 | 14.40 |  |  |  |
| 11    | N  | 167 | N  | 19.20  | 0.00 | 19.20 |  |  |  |
| 11    | CA | 50  | CA | 4.80   | 0.00 | 4.80  |  |  |  |
| 50    | CA | 89  | CA | 4.80   | 0.00 | 4.80  |  |  |  |
| 89    | CA | 128 | CA | 4.80   | 0.00 | 4.80  |  |  |  |
| 128   | CA | 167 | CA | 4.80   | 0.00 | 4.80  |  |  |  |
| 11    | CA | 89  | CA | 9.60   | 0.00 | 9.60  |  |  |  |
| 11    | CA | 128 | CA | 14.40  | 0.00 |       |  |  |  |
| 14.40 |    |     |    |        |      |       |  |  |  |
| 11    | CA | 167 | CA | 19.20  | 0.00 |       |  |  |  |
| 19.20 |    |     |    |        |      |       |  |  |  |
| 11    | CB | 89  | CB | 9.60   | 0.00 | 9.60  |  |  |  |
| 11    | CB | 167 | CB | 19.20  | 0.00 | 19.20 |  |  |  |
| 11    | CG | 89  | CG | 9.60   | 0.00 | 9.60  |  |  |  |
| 11    | CG | 167 | CG | 19.20  | 0.00 |       |  |  |  |
| 19.20 |    |     |    |        |      |       |  |  |  |
| 11    | CD | 89  | CD | 9.60   | 0.00 | 9.60  |  |  |  |
| 11    | CD | 167 | CD | 19.20  | 0.00 |       |  |  |  |
| 19.20 |    |     |    |        |      |       |  |  |  |
| 12    | N  | 51  | N  | 4.80   | 0.00 | 4.80  |  |  |  |
| 51    | N  | 90  | N  | 4.80   | 0.00 | 4.80  |  |  |  |
| 90    | N  | 129 | N  | 4.80   | 0.00 | 4.80  |  |  |  |
| 129   | N  | 168 | N  | 4.80   | 0.00 | 4.80  |  |  |  |
| 12    | N  | 90  | N  | 9.60   | 0.00 | 9.60  |  |  |  |
| 12    | N  | 129 | N  | 14.40  | 0.00 | 14.40 |  |  |  |
| 12    | N  | 168 | N  | 19.20  | 0.00 | 19.20 |  |  |  |
| 12    | CA | 51  | CA | 4.80   | 0.00 | 4.80  |  |  |  |
| 51    | CA | 90  | CA | 4.80   | 0.00 | 4.80  |  |  |  |
| 90    | CA | 129 | CA | 4.80   | 0.00 | 4.80  |  |  |  |
| 129   | CA | 168 | CA | 4.80   | 0.00 | 4.80  |  |  |  |
| 12    | CA | 90  | CA | 9.60   | 0.00 | 9.60  |  |  |  |
| 12    | CA | 129 | CA | 14.40  | 0.00 |       |  |  |  |
| 14.40 |    |     |    |        |      |       |  |  |  |
| 12    | CA | 168 | CA | 19.20  | 0.00 |       |  |  |  |
| 19.20 |    |     |    |        |      |       |  |  |  |
| 12    | CB | 90  | CB | 9.60   | 0.00 | 9.60  |  |  |  |
| 12    | CB | 168 | CB | 19.20  | 0.00 | 19.20 |  |  |  |
| 12    | CG | 90  | CG | 9.60   | 0.00 | 9.60  |  |  |  |
| 12    | CG | 168 | CG | 19.20  | 0.00 |       |  |  |  |
| 19.20 |    |     |    |        |      |       |  |  |  |
| 12    | CD | 90  | CD | 9.60   | 0.00 | 9.60  |  |  |  |
| 12    | CD | 168 | CD | 19.20  | 0.00 |       |  |  |  |
| 19.20 |    |     |    |        |      |       |  |  |  |
| 13    | N  | 52  | N  | 4.80   | 0.00 | 4.80  |  |  |  |
| 52    | N  | 91  | N  | 4.80   | 0.00 | 4.80  |  |  |  |
| 91    | N  | 130 | N  | 4.80   | 0.00 | 4.80  |  |  |  |
| 130   | N  | 169 | N  | 4.80   | 0.00 | 4.80  |  |  |  |
| 13    | N  | 91  | N  | 9.60   | 0.00 | 9.60  |  |  |  |
| 13    | N  | 130 | N  | 14.40  | 0.00 | 14.40 |  |  |  |
| 13    | N  | 169 | N  | 19.20  | 0.00 | 19.20 |  |  |  |
| 13    | CA | 52  | CA | 4.80   | 0.00 | 4.80  |  |  |  |
| 52    | CA | 91  | CA | 4.80   | 0.00 | 4.80  |  |  |  |
| 91    | CA | 130 | CA | 4.80   | 0.00 | 4.80  |  |  |  |
| 130   | CA | 169 | CA | 4.80   | 0.00 | 4.80  |  |  |  |
| 13    | CA | 91  | CA | 9.60   | 0.00 | 9.60  |  |  |  |
| 13    | CA | 130 | CA | 14.40  | 0.00 |       |  |  |  |
| 14.40 |    |     |    |        |      |       |  |  |  |
| 13    | CA | 169 | CA | 19.20  | 0.00 |       |  |  |  |
| 19.20 |    |     |    |        |      |       |  |  |  |
| 13    | CB | 91  | CB | 9.60   | 0.00 | 9.60  |  |  |  |
| 13    | CB | 169 | CB | 19.20  | 0.00 | 19.20 |  |  |  |
| 13    | CG | 91  | CG | 9.60   | 0.00 | 9.60  |  |  |  |
| 13    | CG | 169 | CG | 19.20  | 0.00 |       |  |  |  |
| 19.20 |    |     |    |        |      |       |  |  |  |
| 13    | CD | 91  | CD | 9.60   | 0.00 | 9.60  |  |  |  |
| 13    | CD | 169 | CD | 19.20  | 0.00 |       |  |  |  |
| 19.20 |    |     |    |        |      |       |  |  |  |
| 14    | N  | 53  | N  | 4.80   | 0.00 | 4.80  |  |  |  |
| 53    | N  | 92  | N  | 4.80   | 0.00 | 4.80  |  |  |  |
| 92    | N  | 131 | N  | 4.80   | 0.00 | 4.80  |  |  |  |
| 131   | N  | 170 | N  | 4.80   | 0.00 | 4.80  |  |  |  |
| 14    | N  | 92  | N  | 9.60   | 0.00 | 9.60  |  |  |  |
| 14    | N  | 131 | N  | 14.40  | 0.00 | 14.40 |  |  |  |
| 14    | N  | 170 | N  | 19.20  | 0.00 | 19.20 |  |  |  |
| 14    | CA | 53  | CA | 4.80   | 0.00 | 4.80  |  |  |  |
| 53    | CA | 92  | CA | 4.80   | 0.00 | 4.80  |  |  |  |
| 92    | CA | 131 | CA | 4.80   | 0.00 | 4.80  |  |  |  |
| 131   | CA | 170 | CA | 4.80   | 0.00 | 4.80  |  |  |  |
| 14    | CA | 92  | CA | 9.60   | 0.00 | 9.60  |  |  |  |
| 14    | CA | 131 | CA | 14.40  | 0.00 |       |  |  |  |
| 14.40 |    |     |    |        |      |       |  |  |  |
| 14    | CA | 170 | CA | 19.20  | 0.00 |       |  |  |  |
| 19.20 |    |     |    |        |      |       |  |  |  |
| 14    | CB | 92  | CB | 9.60   | 0.00 | 9.60  |  |  |  |
| 14    | CB | 170 | CB | 19.20  | 0.00 | 19.20 |  |  |  |
| 15    | N  | 54  | N  | 4.80   | 0.00 | 4.80  |  |  |  |
| 54    | N  | 93  | N  | 4.80   | 0.00 | 4.80  |  |  |  |
| 93    | N  | 132 | N  | 4.80   | 0.00 | 4.80  |  |  |  |
| 132   | N  | 171 | N  | 4.80   | 0.00 | 4.80  |  |  |  |
| 15    | N  | 93  | N  | 9.60   | 0.00 | 9.60  |  |  |  |
| 15    | N  | 132 | N  | 14.40  | 0.00 | 14.40 |  |  |  |
| 15    | N  | 171 | N  | 19.20  | 0.00 | 19.20 |  |  |  |
| 15    | CA | 54  | CA | 4.80   | 0.00 | 4.80  |  |  |  |
| 54    | CA | 93  | CA | 4.80   | 0.00 | 4.80  |  |  |  |
| 93    | CA | 132 | CA | 4.80   | 0.00 | 4.80  |  |  |  |
| 132   | CA | 171 | CA | 4.80   | 0.00 | 4.80  |  |  |  |
| 15    | CA | 93  | CA | 9.60   | 0.00 | 9.60  |  |  |  |
| 15    | CA | 132 | CA | 14.40  | 0.00 |       |  |  |  |
| 14.40 |    |     |    |        |      |       |  |  |  |
| 15    | CA | 171 | CA | 19.20  | 0.00 |       |  |  |  |
| 19.20 |    |     |    |        |      |       |  |  |  |
| 15    | CB | 93  | CB | 4.80   | 0.00 | 4.80  |  |  |  |
| 54    | CB | 93  | CB | 4.80   | 0.00 | 4.80  |  |  |  |
| 93    | CB | 132 | CB | 4.80   | 0.00 | 4.80  |  |  |  |
| 132   | CB | 171 | CB | 4.80   | 0.00 | 4.80  |  |  |  |
| 15    | CB | 93  | CB | 9.60   | 0.00 | 9.60  |  |  |  |
| 15    | CB | 132 | CB | 14.40  | 0.00 | 14.40 |  |  |  |
| 15    | CB | 171 | CB | 19.20  | 0.00 | 19.20 |  |  |  |
| 15    | CG | 93  | CG | 4.80   | 0.00 | 4.80  |  |  |  |
| 54    | CG | 93  | CG | 4.80   | 0.00 | 4.80  |  |  |  |
| 93    | CG | 132 | CG | 4.80   | 0.00 | 4.80  |  |  |  |
| 132   | CG | 171 | CG | 4.80   | 0.00 | 4.80  |  |  |  |
| 15    | CG | 93  | CG | 9.60   | 0.00 | 9.60  |  |  |  |
| 15    | CG | 132 | CG | 14.40  | 0.00 |       |  |  |  |
| 14.40 |    |     |    |        |      |       |  |  |  |
| 15    | CG | 171 | CG | 19.20  | 0.00 |       |  |  |  |
| 19.20 |    |     |    |        |      |       |  |  |  |
| 15    | CD | 93  | CD | 4.80   | 0.00 | 4.80  |  |  |  |
| 54    | CD | 93  | CD | 4.80   | 0.00 | 4.80  |  |  |  |
| 93    | CD | 132 | CD | 4.80   | 0.00 | 4.80  |  |  |  |
| 132   | CD | 171 | CD | 4.80   | 0.00 | 4.80  |  |  |  |
| 15    | CD | 93  | CD | 9.60   | 0.00 | 9.60  |  |  |  |
| 15    | CD | 132 | CD | 14.40  | 0.00 |       |  |  |  |
| 14.40 |    |     |    |        |      |       |  |  |  |
| 15    | CD | 171 | CD | 19.20  | 0.00 |       |  |  |  |
| 19.20 |    |     |    |        |      |       |  |  |  |
| 16    | N  | 55  | N  | 4.80   | 0.00 | 4.80  |  |  |  |
| 55    | N  | 94  | N  | 4.80   | 0.00 | 4.80  |  |  |  |
| 94    | N  | 133 | N  | 4.80   | 0.00 | 4.80  |  |  |  |
| 133   | N  | 172 | N  | 4.80   | 0.00 | 4.80  |  |  |  |
| 16    | N  | 94  | N  | 9.60   | 0.00 | 9.60  |  |  |  |
| 16    | N  | 133 | N  | 14.40  | 0.00 | 14.40 |  |  |  |
| 16    | N  | 172 | N  | 19.20  | 0.00 | 19.20 |  |  |  |
| 16    | CA | 55  | CA | 4.80   | 0.00 | 4.80  |  |  |  |
| 55    | CA | 94  | CA | 4.80   | 0.00 | 4.80  |  |  |  |
| 94    | CA | 133 | CA | 4.80   | 0.00 | 4.80  |  |  |  |
| 133   | CA | 172 | CA | 4.80   | 0.00 | 4.80  |  |  |  |
| 16    | CA | 94  | CA | 9.60   | 0.00 | 9.60  |  |  |  |
| 16    | CA | 133 | CA | 14.40  | 0.00 |       |  |  |  |
| 14.40 |    |     |    |        |      |       |  |  |  |
| 16    | CA | 172 | CA | 19.20  | 0.00 |       |  |  |  |
| 19.20 |    |     |    |        |      |       |  |  |  |
| 16    | CB | 55  | CB | 4.80   | 0.00 | 4.80  |  |  |  |
| 55    | CB | 94  | CB | 4.80   | 0.00 | 4.80  |  |  |  |
| 94    | CB | 133 | CB | 4.80   | 0.00 | 4.80  |  |  |  |
| 133   | CB | 172 | CB | 4.80   | 0.00 | 4.80  |  |  |  |
| 16    | CB | 94  | CB | 9.60   | 0.00 | 9.60  |  |  |  |
| 16    | CB | 133 | CB | 14.40  | 0.00 | 14.40 |  |  |  |
| 16    | CB | 172 | CB | 19.20  | 0.00 | 19.20 |  |  |  |
| 17    | N  | 56  | N  | 4.80   | 0.00 | 4.80  |  |  |  |
| 56    | N  | 95  | N  | 4.80</ |      |       |  |  |  |

|       |    |     |    |       |      |       |
|-------|----|-----|----|-------|------|-------|
| 137   | CA | 176 | CA | 4.80  | 0.00 | 4.80  |
| 20    | CA | 98  | CA | 9.60  | 0.00 | 9.60  |
| 20    | CA | 137 | CA | 14.40 | 0.00 |       |
| 14.40 |    |     |    |       |      |       |
| 20    | CA | 176 | CA | 19.20 | 0.00 |       |
| 19.20 |    |     |    |       |      |       |
| 20    | CB | 59  | CB | 4.80  | 0.00 | 4.80  |
| 59    | CB | 98  | CB | 4.80  | 0.00 | 4.80  |
| 98    | CB | 137 | CB | 4.80  | 0.00 | 4.80  |
| 137   | CB | 176 | CB | 4.80  | 0.00 | 4.80  |
| 20    | CB | 98  | CB | 9.60  | 0.00 | 9.60  |
| 20    | CB | 137 | CB | 14.40 | 0.00 | 14.40 |
| 20    | CB | 176 | CB | 19.20 | 0.00 | 19.20 |
| 20    | CG | 59  | CG | 4.80  | 0.00 | 4.80  |
| 59    | CG | 98  | CG | 4.80  | 0.00 | 4.80  |
| 98    | CG | 137 | CG | 4.80  | 0.00 | 4.80  |
| 137   | CG | 176 | CG | 4.80  | 0.00 | 4.80  |
| 20    | CG | 98  | CG | 9.60  | 0.00 | 9.60  |
| 20    | CG | 137 | CG | 14.40 | 0.00 |       |
| 14.40 |    |     |    |       |      |       |
| 20    | CG | 176 | CG | 19.20 | 0.00 |       |
| 19.20 |    |     |    |       |      |       |
| 21    | N  | 60  | N  | 4.80  | 0.00 | 4.80  |
| 60    | N  | 99  | N  | 4.80  | 0.00 | 4.80  |
| 99    | N  | 138 | N  | 4.80  | 0.00 | 4.80  |
| 138   | N  | 177 | N  | 4.80  | 0.00 | 4.80  |
| 21    | N  | 99  | N  | 9.60  | 0.00 | 9.60  |
| 21    | N  | 138 | N  | 14.40 | 0.00 | 14.40 |
| 21    | N  | 177 | N  | 19.20 | 0.00 | 19.20 |
| 21    | CA | 60  | CA | 4.80  | 0.00 | 4.80  |
| 60    | CA | 99  | CA | 4.80  | 0.00 | 4.80  |
| 99    | CA | 138 | CA | 4.80  | 0.00 | 4.80  |
| 138   | CA | 177 | CA | 4.80  | 0.00 | 4.80  |
| 21    | CA | 99  | CA | 9.60  | 0.00 | 9.60  |
| 21    | CA | 138 | CA | 14.40 | 0.00 |       |
| 14.40 |    |     |    |       |      |       |
| 21    | CA | 177 | CA | 19.20 | 0.00 |       |
| 19.20 |    |     |    |       |      |       |
| 21    | CB | 99  | CB | 9.60  | 0.00 | 9.60  |
| 21    | CB | 177 | CB | 19.20 | 0.00 | 19.20 |
| 22    | N  | 61  | N  | 4.80  | 0.00 | 4.80  |
| 61    | N  | 100 | N  | 4.80  | 0.00 | 4.80  |
| 100   | N  | 139 | N  | 4.80  | 0.00 | 4.80  |
| 139   | N  | 178 | N  | 4.80  | 0.00 | 4.80  |
| 22    | N  | 100 | N  | 9.60  | 0.00 | 9.60  |
| 22    | N  | 139 | N  | 14.40 | 0.00 | 14.40 |
| 22    | N  | 178 | N  | 19.20 | 0.00 | 19.20 |
| 22    | CA | 61  | CA | 4.80  | 0.00 | 4.80  |
| 61    | CA | 100 | CA | 4.80  | 0.00 | 4.80  |
| 100   | CA | 139 | CA | 4.80  | 0.00 | 4.80  |
| 139   | CA | 178 | CA | 4.80  | 0.00 | 4.80  |
| 22    | CA | 100 | CA | 9.60  | 0.00 | 9.60  |
| 22    | CA | 139 | CA | 14.40 | 0.00 |       |
| 14.40 |    |     |    |       |      |       |
| 22    | CA | 178 | CA | 19.20 | 0.00 |       |
| 19.20 |    |     |    |       |      |       |
| 22    | CB | 100 | CB | 9.60  | 0.00 | 9.60  |
| 22    | CB | 178 | CB | 19.20 | 0.00 | 19.20 |
| 23    | N  | 62  | N  | 4.80  | 0.00 | 4.80  |
| 62    | N  | 101 | N  | 4.80  | 0.00 | 4.80  |
| 101   | N  | 140 | N  | 4.80  | 0.00 | 4.80  |
| 140   | N  | 179 | N  | 4.80  | 0.00 | 4.80  |
| 23    | N  | 101 | N  | 9.60  | 0.00 | 9.60  |
| 23    | N  | 140 | N  | 14.40 | 0.00 | 14.40 |
| 23    | N  | 179 | N  | 19.20 | 0.00 | 19.20 |
| 23    | CA | 62  | CA | 4.80  | 0.00 | 4.80  |
| 62    | CA | 101 | CA | 4.80  | 0.00 | 4.80  |
| 101   | CA | 140 | CA | 4.80  | 0.00 | 4.80  |
| 140   | CA | 179 | CA | 4.80  | 0.00 | 4.80  |
| 23    | CA | 101 | CA | 9.60  | 0.00 | 9.60  |
| 23    | CA | 140 | CA | 14.40 | 0.00 |       |
| 14.40 |    |     |    |       |      |       |
| 23    | CA | 179 | CA | 19.20 | 0.00 |       |
| 19.20 |    |     |    |       |      |       |
| 23    | CB | 101 | CB | 9.60  | 0.00 | 9.60  |
| 23    | CB | 179 | CB | 19.20 | 0.00 | 19.20 |
| 24    | N  | 63  | N  | 4.80  | 0.00 | 4.80  |
| 63    | N  | 102 | N  | 4.80  | 0.00 | 4.80  |
| 102   | N  | 141 | N  | 4.80  | 0.00 | 4.80  |
| 141   | N  | 180 | N  | 4.80  | 0.00 | 4.80  |
| 24    | N  | 102 | N  | 9.60  | 0.00 | 9.60  |
| 24    | N  | 141 | N  | 14.40 | 0.00 | 14.40 |
| 24    | N  | 180 | N  | 19.20 | 0.00 | 19.20 |
| 24    | CA | 63  | CA | 4.80  | 0.00 | 4.80  |
| 63    | CA | 102 | CA | 4.80  | 0.00 | 4.80  |
| 102   | CA | 141 | CA | 4.80  | 0.00 | 4.80  |
| 141   | CA | 180 | CA | 4.80  | 0.00 | 4.80  |
| 24    | CA | 102 | CA | 9.60  | 0.00 | 9.60  |

|       |    |     |    |       |      |       |
|-------|----|-----|----|-------|------|-------|
| 24    | CA | 141 | CA | 14.40 | 0.00 |       |
| 14.40 |    |     |    |       |      |       |
| 24    | CA | 180 | CA | 19.20 | 0.00 |       |
| 19.20 |    |     |    |       |      |       |
| 24    | CB | 102 | CB | 9.60  | 0.00 | 9.60  |
| 24    | CB | 180 | CB | 19.20 | 0.00 | 19.20 |
| 25    | N  | 64  | N  | 4.80  | 0.00 | 4.80  |
| 64    | N  | 103 | N  | 4.80  | 0.00 | 4.80  |
| 103   | N  | 142 | N  | 4.80  | 0.00 | 4.80  |
| 142   | N  | 181 | N  | 4.80  | 0.00 | 4.80  |
| 25    | N  | 103 | N  | 9.60  | 0.00 | 9.60  |
| 25    | N  | 142 | N  | 14.40 | 0.00 | 14.40 |
| 25    | N  | 181 | N  | 19.20 | 0.00 | 19.20 |
| 25    | CA | 64  | CA | 4.80  | 0.00 | 4.80  |
| 64    | CA | 103 | CA | 4.80  | 0.00 | 4.80  |
| 103   | CA | 142 | CA | 4.80  | 0.00 | 4.80  |
| 142   | CA | 181 | CA | 4.80  | 0.00 | 4.80  |
| 25    | CA | 103 | CA | 9.60  | 0.00 | 9.60  |
| 25    | CA | 142 | CA | 14.40 | 0.00 |       |
| 14.40 |    |     |    |       |      |       |
| 25    | CA | 181 | CA | 19.20 | 0.00 |       |
| 19.20 |    |     |    |       |      |       |
| 25    | CB | 103 | CB | 9.60  | 0.00 | 9.60  |
| 25    | CB | 181 | CB | 19.20 | 0.00 | 19.20 |
| 1     | N  | 40  | N  | 4.80  | 0.00 | 4.80  |
| 40    | N  | 79  | N  | 4.80  | 0.00 | 4.80  |
| 79    | N  | 118 | N  | 4.80  | 0.00 | 4.80  |
| 118   | N  | 157 | N  | 4.80  | 0.00 | 4.80  |
| 1     | N  | 79  | N  | 9.60  | 0.00 | 9.60  |
| 1     | N  | 118 | N  | 14.40 | 0.00 | 14.40 |
| 1     | N  | 157 | N  | 19.20 | 0.00 | 19.20 |
| 1     | CA | 40  | CA | 4.80  | 0.00 | 4.80  |
| 40    | CA | 79  | CA | 4.80  | 0.00 | 4.80  |
| 79    | CA | 118 | CA | 4.80  | 0.00 | 4.80  |
| 118   | CA | 157 | CA | 4.80  | 0.00 | 4.80  |
| 1     | CA | 79  | CA | 9.60  | 0.00 | 9.60  |
| 1     | CA | 118 | CA | 14.40 | 0.00 | 14.40 |
| 1     | CA | 157 | CA | 19.20 | 0.00 | 19.20 |
| 1     | CA | 157 | CA | 19.20 | 0.00 | 19.20 |
| 2     | N  | 41  | N  | 4.80  | 0.00 | 4.80  |
| 41    | N  | 80  | N  | 4.80  | 0.00 | 4.80  |
| 80    | N  | 119 | N  | 4.80  | 0.00 | 4.80  |
| 119   | N  | 158 | N  | 4.80  | 0.00 | 4.80  |
| 2     | N  | 80  | N  | 9.60  | 0.00 | 9.60  |
| 2     | N  | 119 | N  | 14.40 | 0.00 | 14.40 |
| 2     | N  | 158 | N  | 19.20 | 0.00 | 19.20 |
| 2     | CA | 41  | CA | 4.80  | 0.00 | 4.80  |
| 41    | CA | 80  | CA | 4.80  | 0.00 | 4.80  |
| 80    | CA | 119 | CA | 4.80  | 0.00 | 4.80  |
| 119   | CA | 158 | CA | 4.80  | 0.00 | 4.80  |
| 2     | CA | 80  | CA | 9.60  | 0.00 | 9.60  |
| 2     | CA | 119 | CA | 14.40 | 0.00 | 14.40 |
| 2     | CA | 158 | CA | 19.20 | 0.00 | 19.20 |
| 2     | CB | 80  | CB | 9.60  | 0.00 | 9.60  |
| 2     | CB | 158 | CB | 19.20 | 0.00 | 19.20 |
| 2     | CG | 80  | CG | 9.60  | 0.00 | 9.60  |
| 2     | CG | 158 | CG | 19.20 | 0.00 | 19.20 |
| 2     | CD | 80  | CD | 9.60  | 0.00 | 9.60  |
| 2     | CD | 158 | CD | 19.20 | 0.00 | 19.20 |
| 3     | N  | 42  | N  | 4.80  | 0.00 | 4.80  |
| 42    | N  | 81  | N  | 4.80  | 0.00 | 4.80  |
| 81    | N  | 120 | N  | 4.80  | 0.00 | 4.80  |
| 120   | N  | 159 | N  | 4.80  | 0.00 | 4.80  |
| 3     | N  | 81  | N  | 9.60  | 0.00 | 9.60  |
| 3     | N  | 120 | N  | 14.40 | 0.00 | 14.40 |
| 3     | N  | 159 | N  | 19.20 | 0.00 | 19.20 |
| 3     | CA | 42  | CA | 4.80  | 0.00 | 4.80  |
| 42    | CA | 81  | CA | 4.80  | 0.00 | 4.80  |
| 81    | CA | 120 | CA | 4.80  | 0.00 | 4.80  |
| 120   | CA | 159 | CA | 4.80  | 0.00 | 4.80  |
| 3     | CA | 81  | CA | 9.60  | 0.00 | 9.60  |
| 3     | CA | 120 | CA | 14.40 | 0.00 | 14.40 |
| 3     | CA | 159 | CA | 19.20 | 0.00 | 19.20 |
| 3     | CB | 42  | CB | 4.80  | 0.00 | 4.80  |
| 42    | CB | 81  | CB | 4.80  | 0.00 | 4.80  |
| 81    | CB | 120 | CB | 4.80  | 0.00 | 4.80  |
| 120   | CB | 159 | CB | 4.80  | 0.00 | 4.80  |
| 3     | CB | 81  | CB | 9.60  | 0.00 | 9.60  |
| 3     | CB | 120 | CB | 14.40 | 0.00 | 14.40 |
| 3     | CB | 159 | CB | 19.20 | 0.00 | 19.20 |
| 3     | CG | 42  | CG | 4.80  | 0.00 | 4.80  |
| 42    | CG | 81  | CG | 4.80  | 0.00 | 4.80  |
| 81    | CG | 120 | CG | 4.80  | 0.00 | 4.80  |
| 120   | CG | 159 | CG | 4.80  | 0.00 | 4.80  |
| 3     | CG | 81  | CG | 9.60  | 0.00 | 9.60  |
| 3     | CG | 120 | CG | 14.40 | 0.00 | 14.40 |
| 3     | CG | 159 | CG | 19.20 | 0.00 | 19.20 |
| 4     | N  | 43  | N  | 4.80  | 0.00 | 4.80  |
| 43    | N  | 82  | N  | 4.80  | 0.00 | 4.80  |

|     |    |     |    |       |      |       |
|-----|----|-----|----|-------|------|-------|
| 82  | N  | 121 | N  | 4.80  | 0.00 | 4.80  |
| 121 | N  | 160 | N  | 4.80  | 0.00 | 4.80  |
| 4   | N  | 82  | N  | 9.60  | 0.00 | 9.60  |
| 4   | N  | 121 | N  | 14.40 | 0.00 | 14.40 |
| 4   | N  | 160 | N  | 19.20 | 0.00 | 19.20 |
| 4   | CA | 43  | CA | 4.80  | 0.00 | 4.80  |
| 43  | CA | 82  | CA | 4.80  | 0.00 | 4.80  |
| 82  | CA | 121 | CA | 4.80  | 0.00 | 4.80  |
| 121 | CA | 160 | CA | 4.80  | 0.00 | 4.80  |
| 4   | CA | 82  | CA | 9.60  | 0.00 | 9.60  |
| 4   | CA | 121 | CA | 14.40 | 0.00 | 14.40 |
| 4   | CA | 160 | CA | 19.20 | 0.00 | 19.20 |
| 4   | CB | 43  | CB | 4.80  | 0.00 | 4.80  |
| 43  | CB | 82  | CB | 4.80  | 0.00 | 4.80  |
| 82  | CB | 121 | CB | 4.80  | 0.00 | 4.80  |
| 121 | CB | 160 | CB | 4.80  | 0.00 | 4.80  |
| 4   | CB | 82  | CB | 9.60  | 0.00 | 9.60  |
| 4   | CB | 121 | CB | 14.40 | 0.00 | 14.40 |
| 4   | CB | 160 | CB | 19.20 | 0.00 | 19.20 |
| 5   | N  | 44  | N  | 4.80  | 0.00 | 4.80  |
| 44  | N  | 83  | N  | 4.80  | 0.00 | 4.80  |
| 83  | N  | 122 | N  | 4.80  | 0.00 | 4.80  |
| 122 | N  | 161 | N  | 4.80  | 0.00 | 4.80  |
| 5   | N  | 83  | N  | 9.60  | 0.00 | 9.60  |
| 5   | N  | 122 | N  | 14.40 | 0.00 | 14.40 |
| 5   | N  | 161 | N  | 19.20 | 0.00 | 19.20 |
| 5   | CA | 44  | CA | 4.80  | 0.00 | 4.80  |
| 44  | CA | 83  | CA | 4.80  | 0.00 | 4.80  |
| 83  | CA | 122 | CA | 4.80  | 0.00 | 4.80  |
| 122 | CA | 161 | CA | 4.80  | 0.00 | 4.80  |
| 5   | CA | 83  | CA | 9.60  | 0.00 | 9.60  |
| 5   | CA | 122 | CA | 14.40 | 0.00 | 14.40 |
| 5   | CA | 161 | CA | 19.20 | 0.00 | 19.20 |
| 5   | CB | 83  | CB | 9.60  | 0.00 | 9.60  |
| 5   | CB | 161 | CB | 19.20 | 0.00 | 19.20 |
| 6   | N  | 45  | N  | 4.80  | 0.00 | 4.80  |
| 45  | N  | 84  | N  | 4.80  | 0.00 | 4.80  |
| 84  | N  | 123 | N  | 4.80  | 0.00 | 4.80  |
| 123 | N  | 162 | N  | 4.80  | 0.00 | 4.80  |
| 6   |    |     |    |       |      |       |

















|       |    |     |    |       |      |       |       |    |     |    |       |      |       |     |     |     |       |       |       |       |
|-------|----|-----|----|-------|------|-------|-------|----|-----|----|-------|------|-------|-----|-----|-----|-------|-------|-------|-------|
| 18    | CB | 96  | CB | 9.60  | 0.00 | 9.60  | 139   | CA | 178 | CA | 4.80  | 0.00 | 4.80  | 2   | CA  | 119 | CA    | 14.40 | 0.00  | 14.40 |
| 18    | CB | 135 | CB | 14.40 | 0.00 | 14.40 | 22    | CA | 100 | CA | 9.60  | 0.00 | 9.60  | 2   | CA  | 158 | CA    | 19.20 | 0.00  | 19.20 |
| 18    | CB | 174 | CB | 19.20 | 0.00 | 19.20 | 22    | CA | 139 | CA | 14.40 | 0.00 |       | 2   | CB  | 80  | CB    | 9.60  | 0.00  | 9.60  |
| 18    | CG | 57  | CG | 4.80  | 0.00 | 4.80  | 14.40 |    |     |    |       |      | 2     | CB  | 158 | CB  | 19.20 | 0.00  | 19.20 |       |
| 57    | CG | 96  | CG | 4.80  | 0.00 | 4.80  | 22    | CA | 178 | CA | 19.20 | 0.00 |       | 2   | CG  | 80  | CG    | 9.60  | 0.00  | 9.60  |
| 96    | CG | 135 | CG | 4.80  | 0.00 | 4.80  | 19.20 |    |     |    |       |      | 2     | CG  | 158 | CG  | 19.20 | 0.00  | 19.20 |       |
| 135   | CG | 174 | CG | 4.80  | 0.00 | 4.80  | 22    | CB | 100 | CB | 9.60  | 0.00 | 9.60  | 2   | CD  | 80  | CD    | 9.60  | 0.00  | 9.60  |
| 18    | CG | 96  | CG | 9.60  | 0.00 | 9.60  | 22    | CB | 178 | CB | 19.20 | 0.00 | 19.20 | 2   | CD  | 158 | CD    | 19.20 | 0.00  | 19.20 |
| 18    | CG | 135 | CG | 14.40 | 0.00 |       | 23    | N  | 62  | N  | 4.80  | 0.00 | 4.80  | 3   | N   | 42  | N     | 4.80  | 0.00  | 4.80  |
| 14.40 |    |     |    |       |      |       | 62    | N  | 101 | N  | 4.80  | 0.00 | 4.80  | 42  | N   | 81  | N     | 4.80  | 0.00  | 4.80  |
| 18    | CG | 174 | CG | 19.20 | 0.00 |       | 101   | N  | 140 | N  | 4.80  | 0.00 | 4.80  | 81  | N   | 120 | N     | 4.80  | 0.00  | 4.80  |
| 19.20 |    |     |    |       |      |       | 140   | N  | 179 | N  | 4.80  | 0.00 | 4.80  | 120 | N   | 159 | N     | 4.80  | 0.00  | 4.80  |
| 19    | N  | 58  | N  | 4.80  | 0.00 | 4.80  | 23    | N  | 101 | N  | 9.60  | 0.00 | 9.60  | 3   | N   | 81  | N     | 9.60  | 0.00  | 9.60  |
| 58    | N  | 97  | N  | 4.80  | 0.00 | 4.80  | 23    | N  | 140 | N  | 14.40 | 0.00 | 14.40 | 3   | N   | 120 | N     | 14.40 | 0.00  | 14.40 |
| 97    | N  | 136 | N  | 4.80  | 0.00 | 4.80  | 23    | N  | 179 | N  | 19.20 | 0.00 | 19.20 | 3   | N   | 159 | N     | 19.20 | 0.00  | 19.20 |
| 136   | N  | 175 | N  | 4.80  | 0.00 | 4.80  | 23    | CA | 62  | CA | 4.80  | 0.00 | 4.80  | 3   | CA  | 42  | CA    | 4.80  | 0.00  | 4.80  |
| 19    | N  | 97  | N  | 9.60  | 0.00 | 9.60  | 62    | CA | 101 | CA | 4.80  | 0.00 | 4.80  | 42  | CA  | 81  | CA    | 4.80  | 0.00  | 4.80  |
| 19    | N  | 136 | N  | 14.40 | 0.00 | 14.40 | 101   | CA | 140 | CA | 4.80  | 0.00 | 4.80  | 81  | CA  | 120 | CA    | 4.80  | 0.00  | 4.80  |
| 19    | N  | 175 | N  | 19.20 | 0.00 | 19.20 | 140   | CA | 179 | CA | 4.80  | 0.00 | 4.80  | 120 | CA  | 159 | CA    | 4.80  | 0.00  | 4.80  |
| 19    | CA | 58  | CA | 4.80  | 0.00 | 4.80  | 23    | CA | 101 | CA | 9.60  | 0.00 | 9.60  | 3   | CA  | 81  | CA    | 9.60  | 0.00  | 9.60  |
| 58    | CA | 97  | CA | 4.80  | 0.00 | 4.80  | 23    | CA | 140 | CA | 14.40 | 0.00 |       | 3   | CA  | 120 | CA    | 14.40 | 0.00  | 14.40 |
| 97    | CA | 136 | CA | 4.80  | 0.00 | 4.80  | 14.40 |    |     |    |       |      | 3     | CA  | 159 | CA  | 19.20 | 0.00  | 19.20 |       |
| 136   | CA | 175 | CA | 4.80  | 0.00 | 4.80  | 23    | CA | 179 | CA | 19.20 | 0.00 |       | 3   | CB  | 42  | CB    | 4.80  | 0.00  | 4.80  |
| 19    | CA | 97  | CA | 9.60  | 0.00 | 9.60  | 19.20 |    |     |    |       |      | 42    | CB  | 81  | CB  | 4.80  | 0.00  | 4.80  |       |
| 19    | CA | 136 | CA | 14.40 | 0.00 |       | 23    | CB | 101 | CB | 9.60  | 0.00 | 9.60  | 81  | CB  | 120 | CB    | 4.80  | 0.00  | 4.80  |
| 14.40 |    |     |    |       |      |       | 23    | CB | 179 | CB | 19.20 | 0.00 | 19.20 | 120 | CB  | 159 | CB    | 4.80  | 0.00  | 4.80  |
| 19    | CA | 175 | CA | 19.20 | 0.00 |       | 24    | N  | 63  | N  | 4.80  | 0.00 | 4.80  | 3   | CB  | 81  | CB    | 9.60  | 0.00  | 9.60  |
| 19.20 |    |     |    |       |      |       | 63    | N  | 102 | N  | 4.80  | 0.00 | 4.80  | 3   | CB  | 120 | CB    | 14.40 | 0.00  | 14.40 |
| 20    | N  | 59  | N  | 4.80  | 0.00 | 4.80  | 102   | N  | 141 | N  | 4.80  | 0.00 | 4.80  | 3   | CB  | 159 | CB    | 19.20 | 0.00  | 19.20 |
| 59    | N  | 98  | N  | 4.80  | 0.00 | 4.80  | 141   | N  | 180 | N  | 4.80  | 0.00 | 4.80  | 3   | CG  | 42  | CG    | 4.80  | 0.00  | 4.80  |
| 98    | N  | 137 | N  | 4.80  | 0.00 | 4.80  | 24    | N  | 102 | N  | 9.60  | 0.00 | 9.60  | 42  | CG  | 81  | CG    | 4.80  | 0.00  | 4.80  |
| 137   | N  | 176 | N  | 4.80  | 0.00 | 4.80  | 24    | N  | 141 | N  | 14.40 | 0.00 | 14.40 | 81  | CG  | 120 | CG    | 4.80  | 0.00  | 4.80  |
| 20    | N  | 98  | N  | 9.60  | 0.00 | 9.60  | 24    | N  | 180 | N  | 19.20 | 0.00 | 19.20 | 120 | CG  | 159 | CG    | 4.80  | 0.00  | 4.80  |
| 20    | N  | 137 | N  | 14.40 | 0.00 | 14.40 | 24    | CA | 63  | CA | 4.80  | 0.00 | 4.80  | 3   | CG  | 81  | CG    | 9.60  | 0.00  | 9.60  |
| 20    | N  | 176 | N  | 19.20 | 0.00 | 19.20 | 63    | CA | 102 | CA | 4.80  | 0.00 | 4.80  | 3   | CG  | 120 | CG    | 14.40 | 0.00  | 14.40 |
| 20    | CA | 59  | CA | 4.80  | 0.00 | 4.80  | 102   | CA | 141 | CA | 4.80  | 0.00 | 4.80  | 3   | CG  | 159 | CG    | 19.20 | 0.00  | 19.20 |
| 59    | CA | 98  | CA | 4.80  | 0.00 | 4.80  | 141   | CA | 180 | CA | 4.80  | 0.00 | 4.80  | 4   | N   | 43  | N     | 4.80  | 0.00  | 4.80  |
| 98    | CA | 137 | CA | 4.80  | 0.00 | 4.80  | 24    | CA | 102 | CA | 9.60  | 0.00 | 9.60  | 43  | N   | 82  | N     | 4.80  | 0.00  | 4.80  |
| 137   | CA | 176 | CA | 4.80  | 0.00 | 4.80  | 24    | CA | 141 | CA | 14.40 | 0.00 |       | 82  | N   | 121 | N     | 4.80  | 0.00  | 4.80  |
| 20    | CA | 98  | CA | 9.60  | 0.00 | 9.60  | 14.40 |    |     |    |       |      | 121   | N   | 160 | N   | 4.80  | 0.00  | 4.80  |       |
| 20    | CA | 137 | CA | 14.40 | 0.00 |       | 24    | CA | 180 | CA | 19.20 | 0.00 |       | 4   | N   | 82  | N     | 9.60  | 0.00  | 9.60  |
| 14.40 |    |     |    |       |      |       | 19.20 |    |     |    |       |      | 4     | N   | 121 | N   | 14.40 | 0.00  | 14.40 |       |
| 20    | CA | 176 | CA | 19.20 | 0.00 |       | 24    | CB | 102 | CB | 9.60  | 0.00 | 9.60  | 4   | N   | 160 | N     | 19.20 | 0.00  | 19.20 |
| 19.20 |    |     |    |       |      |       | 24    | CB | 180 | CB | 19.20 | 0.00 | 19.20 | 4   | CA  | 43  | CA    | 4.80  | 0.00  | 4.80  |
| 20    | CB | 59  | CB | 4.80  | 0.00 | 4.80  | 25    | N  | 64  | N  | 4.80  | 0.00 | 4.80  | 43  | CA  | 82  | CA    | 4.80  | 0.00  | 4.80  |
| 59    | CB | 98  | CB | 4.80  | 0.00 | 4.80  | 64    | N  | 103 | N  | 4.80  | 0.00 | 4.80  | 82  | CA  | 121 | CA    | 4.80  | 0.00  | 4.80  |
| 98    | CB | 137 | CB | 4.80  | 0.00 | 4.80  | 103   | N  | 142 | N  | 4.80  | 0.00 | 4.80  | 121 | CA  | 160 | CA    | 4.80  | 0.00  | 4.80  |
| 137   | CB | 176 | CB | 4.80  | 0.00 | 4.80  | 142   | N  | 181 | N  | 4.80  | 0.00 | 4.80  | 4   | CA  | 82  | CA    | 9.60  | 0.00  | 9.60  |
| 20    | CB | 98  | CB | 9.60  | 0.00 | 9.60  | 25    | N  | 103 | N  | 9.60  | 0.00 | 9.60  | 4   | CA  | 121 | CA    | 14.40 | 0.00  | 14.40 |
| 20    | CB | 137 | CB | 14.40 | 0.00 | 14.40 | 25    | N  | 142 | N  | 14.40 | 0.00 | 14.40 | 4   | CA  | 160 | CA    | 19.20 | 0.00  | 19.20 |
| 20    | CB | 176 | CB | 19.20 | 0.00 | 19.20 | 25    | N  | 181 | N  | 19.20 | 0.00 | 19.20 | 4   | CB  | 43  | CB    | 4.80  | 0.00  | 4.80  |
| 20    | CG | 59  | CG | 4.80  | 0.00 | 4.80  | 25    | CA | 64  | CA | 4.80  | 0.00 | 4.80  | 43  | CB  | 82  | CB    | 4.80  | 0.00  | 4.80  |
| 59    | CG | 98  | CG | 4.80  | 0.00 | 4.80  | 64    | CA | 103 | CA | 4.80  | 0.00 | 4.80  | 82  | CB  | 121 | CB    | 4.80  | 0.00  | 4.80  |
| 98    | CG | 137 | CG | 4.80  | 0.00 | 4.80  | 103   | CA | 142 | CA | 4.80  | 0.00 | 4.80  | 121 | CB  | 160 | CB    | 4.80  | 0.00  | 4.80  |
| 137   | CG | 176 | CG | 4.80  | 0.00 | 4.80  | 142   | CA | 181 | CA | 4.80  | 0.00 | 4.80  | 4   | CB  | 82  | CB    | 9.60  | 0.00  | 9.60  |
| 20    | CG | 98  | CG | 9.60  | 0.00 | 9.60  | 25    | CA | 103 | CA | 9.60  | 0.00 | 9.60  | 4   | CB  | 121 | CB    | 14.40 | 0.00  | 14.40 |
| 20    | CG | 137 | CG | 14.40 | 0.00 |       | 25    | CA | 142 | CA | 14.40 | 0.00 |       | 4   | CB  | 160 | CB    | 19.20 | 0.00  | 19.20 |
| 14.40 |    |     |    |       |      |       | 14.40 |    |     |    |       |      | 5     | N   | 44  | N   | 4.80  | 0.00  | 4.80  |       |
| 20    | CG | 176 | CG | 19.20 | 0.00 |       | 25    | CA | 181 | CA | 19.20 | 0.00 |       | 44  | N   | 83  | N     | 4.80  | 0.00  | 4.80  |
| 19.20 |    |     |    |       |      |       | 19.20 |    |     |    |       |      | 83    | N   | 122 | N   | 4.80  | 0.00  | 4.80  |       |
| 21    | N  | 60  | N  | 4.80  | 0.00 | 4.80  | 25    | CB | 103 | CB | 9.60  | 0.00 | 9.60  | 122 | N   | 161 | N     | 4.80  | 0.00  | 4.80  |
| 60    | N  | 99  | N  | 4.80  | 0.00 | 4.80  | 25    | CB | 181 | CB | 19.20 | 0.00 | 19.20 | 5   | N   | 83  | N     | 9.60  | 0.00  | 9.60  |
| 99    | N  | 138 | N  | 4.80  | 0.00 | 4.80  | 1     | N  | 40  | N  | 4.80  | 0.00 | 4.80  | 5   | N   | 122 | N     | 14.40 | 0.00  | 14.40 |
| 138   | N  | 177 | N  | 4.80  | 0.00 | 4.80  | 40    | N  | 79  | N  | 4.80  | 0.00 | 4.80  | 5   | N   | 161 | N     | 19.20 | 0.00  | 19.20 |
| 21    | N  | 99  | N  | 9.60  | 0.00 | 9.60  | 79    | N  | 118 | N  | 4.80  | 0.00 | 4.80  | 5   | CA  | 44  | CA    | 4.80  | 0.00  | 4.80  |
| 21    | N  | 138 | N  | 14.40 | 0.00 | 14.40 | 118   | N  | 157 | N  | 4.80  | 0.00 | 4.80  | 44  | CA  | 83  | CA    | 4.80  | 0.00  | 4.80  |
| 21    | N  | 177 | N  | 19.20 | 0.00 | 19.20 | 1     | N  | 79  | N  | 9.60  | 0.00 | 9.60  | 83  | CA  | 122 | CA    | 4.80  | 0.00  | 4.80  |
| 21    | CA | 60  | CA | 4.80  | 0.00 | 4.80  | 1     | N  | 118 | N  | 14.40 | 0.00 | 14.40 | 122 | CA  | 161 | CA    | 4.80  | 0.00  | 4.80  |
| 60    | CA | 99  | CA | 4.80  | 0.00 | 4.80  | 1     | N  | 157 | N  | 19.20 | 0.00 | 19.20 | 5   | CA  | 83  | CA    | 9.60  | 0.00  | 9.60  |
| 99    | CA | 138 | CA | 4.80  | 0.00 | 4.80  | 1     | CA | 40  | CA | 4.80  | 0.00 | 4.80  | 5   | CA  | 122 | CA    | 14.40 | 0.00  | 14.40 |
| 138   | CA | 177 | CA | 4.80  | 0.00 | 4.80  | 40    | CA | 79  | CA | 4.80  | 0.00 | 4.80  | 5   | CA  | 161 | CA    | 19.20 | 0.00  | 19.20 |
| 21    | CA | 99  | CA | 9.60  | 0.00 | 9.60  | 79    | CA | 118 | CA | 4.80  | 0.00 | 4.80  | 5   | CB  | 83  | CB    | 9.60  | 0.00  | 9.60  |
| 21    | CA | 138 | CA | 14.40 | 0.00 |       | 118   | CA | 157 | CA | 4.80  | 0.00 | 4.80  | 5   | CB  | 161 | CB    | 19.20 | 0.00  | 19.20 |
| 14.40 |    |     |    |       |      |       | 1     | CA | 79  | CA | 9.60  | 0.00 | 9.60  | 6   | N   | 45  | N     | 4.80  | 0.00  | 4.80  |
| 21    | CA | 177 | CA | 19.20 | 0.00 |       | 1     | CA | 118 | CA | 14.40 | 0.00 | 14.40 | 45  | N   | 84  | N     | 4.80  | 0.00  | 4.80  |
| 19.20 |    |     |    |       |      |       | 1     | CA | 157 | CA | 19.20 | 0.00 | 19.20 | 84  | N   | 123 | N     | 4.80  | 0.00  | 4.80  |
| 21    | CB | 99  | CB | 9.60  | 0.00 | 9.60  | 2     | N  | 41  | N  | 4.80  | 0.00 | 4.80  | 123 | N   | 162 | N     | 4.80  | 0.00  | 4.80  |
| 21    | CB | 177 | CB | 19.20 | 0.00 | 19.20 | 41    | N  | 80  | N  | 4.80  | 0.00 |       |     |     |     |       |       |       |       |













|     |    |     |    |       |      |       |
|-----|----|-----|----|-------|------|-------|
| 57  | CA | 96  | CA | 4.80  | 0.00 | 4.80  |
| 96  | CA | 135 | CA | 4.80  | 0.00 | 4.80  |
| 135 | CA | 174 | CA | 4.80  | 0.00 | 4.80  |
| 18  | CA | 96  | CA | 9.60  | 0.00 | 9.60  |
| 18  | CA | 135 | CA | 14.40 | 0.00 | 14.40 |
| 18  | CA | 174 | CA | 19.20 | 0.00 | 19.20 |
| 18  | CB | 57  | CB | 4.80  | 0.00 | 4.80  |
| 57  | CB | 96  | CB | 4.80  | 0.00 | 4.80  |
| 96  | CB | 135 | CB | 4.80  | 0.00 | 4.80  |
| 135 | CB | 174 | CB | 4.80  | 0.00 | 4.80  |
| 18  | CB | 96  | CB | 9.60  | 0.00 | 9.60  |
| 18  | CB | 135 | CB | 14.40 | 0.00 | 14.40 |
| 18  | CB | 174 | CB | 19.20 | 0.00 | 19.20 |
| 18  | CG | 57  | CG | 4.80  | 0.00 | 4.80  |
| 57  | CG | 96  | CG | 4.80  | 0.00 | 4.80  |
| 96  | CG | 135 | CG | 4.80  | 0.00 | 4.80  |
| 135 | CG | 174 | CG | 4.80  | 0.00 | 4.80  |
| 18  | CG | 96  | CG | 9.60  | 0.00 | 9.60  |
| 18  | CG | 135 | CG | 14.40 | 0.00 | 14.40 |
| 18  | CG | 174 | CG | 19.20 | 0.00 | 19.20 |
| 19  | N  | 58  | N  | 4.80  | 0.00 | 4.80  |
| 58  | N  | 97  | N  | 4.80  | 0.00 | 4.80  |
| 97  | N  | 136 | N  | 4.80  | 0.00 | 4.80  |
| 136 | N  | 175 | N  | 4.80  | 0.00 | 4.80  |
| 19  | N  | 97  | N  | 9.60  | 0.00 | 9.60  |
| 19  | N  | 136 | N  | 14.40 | 0.00 | 14.40 |
| 19  | N  | 175 | N  | 19.20 | 0.00 | 19.20 |
| 19  | CA | 58  | CA | 4.80  | 0.00 | 4.80  |
| 58  | CA | 97  | CA | 4.80  | 0.00 | 4.80  |
| 97  | CA | 136 | CA | 4.80  | 0.00 | 4.80  |
| 136 | CA | 175 | CA | 4.80  | 0.00 | 4.80  |
| 19  | CA | 97  | CA | 9.60  | 0.00 | 9.60  |
| 19  | CA | 136 | CA | 14.40 | 0.00 | 14.40 |
| 19  | CA | 175 | CA | 19.20 | 0.00 | 19.20 |
| 20  | N  | 59  | N  | 4.80  | 0.00 | 4.80  |
| 59  | N  | 98  | N  | 4.80  | 0.00 | 4.80  |
| 98  | N  | 137 | N  | 4.80  | 0.00 | 4.80  |
| 137 | N  | 176 | N  | 4.80  | 0.00 | 4.80  |
| 20  | N  | 98  | N  | 9.60  | 0.00 | 9.60  |
| 20  | N  | 137 | N  | 14.40 | 0.00 | 14.40 |
| 20  | N  | 176 | N  | 19.20 | 0.00 | 19.20 |
| 20  | CA | 59  | CA | 4.80  | 0.00 | 4.80  |
| 59  | CA | 98  | CA | 4.80  | 0.00 | 4.80  |
| 98  | CA | 137 | CA | 4.80  | 0.00 | 4.80  |
| 137 | CA | 176 | CA | 4.80  | 0.00 | 4.80  |
| 20  | CA | 98  | CA | 9.60  | 0.00 | 9.60  |
| 20  | CA | 137 | CA | 14.40 | 0.00 | 14.40 |
| 20  | CA | 176 | CA | 19.20 | 0.00 | 19.20 |
| 20  | CB | 59  | CB | 4.80  | 0.00 | 4.80  |
| 59  | CB | 98  | CB | 4.80  | 0.00 | 4.80  |
| 98  | CB | 137 | CB | 4.80  | 0.00 | 4.80  |
| 137 | CB | 176 | CB | 4.80  | 0.00 | 4.80  |
| 20  | CB | 98  | CB | 9.60  | 0.00 | 9.60  |
| 20  | CB | 137 | CB | 14.40 | 0.00 | 14.40 |
| 20  | CB | 176 | CB | 19.20 | 0.00 | 19.20 |
| 20  | CG | 59  | CG | 4.80  | 0.00 | 4.80  |
| 59  | CG | 98  | CG | 4.80  | 0.00 | 4.80  |
| 98  | CG | 137 | CG | 4.80  | 0.00 | 4.80  |
| 137 | CG | 176 | CG | 4.80  | 0.00 | 4.80  |
| 20  | CG | 98  | CG | 9.60  | 0.00 | 9.60  |
| 20  | CG | 137 | CG | 14.40 | 0.00 | 14.40 |
| 20  | CG | 176 | CG | 19.20 | 0.00 | 19.20 |
| 21  | N  | 60  | N  | 4.80  | 0.00 | 4.80  |
| 60  | N  | 99  | N  | 4.80  | 0.00 | 4.80  |
| 99  | N  | 138 | N  | 4.80  | 0.00 | 4.80  |
| 138 | N  | 177 | N  | 4.80  | 0.00 | 4.80  |
| 21  | N  | 99  | N  | 9.60  | 0.00 | 9.60  |
| 21  | N  | 138 | N  | 14.40 | 0.00 | 14.40 |
| 21  | N  | 177 | N  | 19.20 | 0.00 | 19.20 |
| 21  | CA | 60  | CA | 4.80  | 0.00 | 4.80  |
| 60  | CA | 99  | CA | 4.80  | 0.00 | 4.80  |
| 99  | CA | 138 | CA | 4.80  | 0.00 | 4.80  |
| 138 | CA | 177 | CA | 4.80  | 0.00 | 4.80  |
| 21  | CA | 99  | CA | 9.60  | 0.00 | 9.60  |
| 21  | CA | 138 | CA | 14.40 | 0.00 | 14.40 |
| 21  | CA | 177 | CA | 19.20 | 0.00 | 19.20 |
| 21  | CB | 99  | CB | 9.60  | 0.00 | 9.60  |
| 21  | CB | 177 | CB | 19.20 | 0.00 | 19.20 |
| 22  | N  | 61  | N  | 4.80  | 0.00 | 4.80  |
| 61  | N  | 100 | N  | 4.80  | 0.00 | 4.80  |
| 100 | N  | 139 | N  | 4.80  | 0.00 | 4.80  |
| 139 | N  | 178 | N  | 4.80  | 0.00 | 4.80  |
| 22  | N  | 100 | N  | 9.60  | 0.00 | 9.60  |
| 22  | N  | 139 | N  | 14.40 | 0.00 | 14.40 |
| 22  | N  | 178 | N  | 19.20 | 0.00 | 19.20 |
| 22  | CA | 61  | CA | 4.80  | 0.00 | 4.80  |
| 61  | CA | 100 | CA | 4.80  | 0.00 | 4.80  |
| 100 | CA | 139 | CA | 4.80  | 0.00 | 4.80  |
| 139 | CA | 178 | CA | 4.80  | 0.00 | 4.80  |
| 22  | CA | 100 | CA | 9.60  | 0.00 | 9.60  |
| 22  | CA | 139 | CA | 14.40 | 0.00 | 14.40 |
| 22  | CA | 178 | CA | 19.20 | 0.00 | 19.20 |
| 22  | CB | 100 | CB | 9.60  | 0.00 | 9.60  |
| 22  | CB | 178 | CB | 19.20 | 0.00 | 19.20 |
| 23  | N  | 62  | N  | 4.80  | 0.00 | 4.80  |
| 62  | N  | 101 | N  | 4.80  | 0.00 | 4.80  |
| 101 | N  | 140 | N  | 4.80  | 0.00 | 4.80  |
| 140 | N  | 179 | N  | 4.80  | 0.00 | 4.80  |
| 23  | N  | 101 | N  | 9.60  | 0.00 | 9.60  |
| 23  | N  | 140 | N  | 14.40 | 0.00 | 14.40 |
| 23  | N  | 179 | N  | 19.20 | 0.00 | 19.20 |
| 23  | CA | 62  | CA | 4.80  | 0.00 | 4.80  |
| 62  | CA | 101 | CA | 4.80  | 0.00 | 4.80  |
| 101 | CA | 140 | CA | 4.80  | 0.00 | 4.80  |
| 140 | CA | 179 | CA | 4.80  | 0.00 | 4.80  |
| 23  | CA | 101 | CA | 9.60  | 0.00 | 9.60  |
| 23  | CA | 140 | CA | 14.40 | 0.00 | 14.40 |
| 23  | CA | 179 | CA | 19.20 | 0.00 | 19.20 |
| 23  | CB | 101 | CB | 9.60  | 0.00 | 9.60  |
| 23  | CB | 179 | CB | 19.20 | 0.00 | 19.20 |
| 24  | N  | 63  | N  | 4.80  | 0.00 | 4.80  |
| 63  | N  | 102 | N  | 4.80  | 0.00 | 4.80  |
| 102 | N  | 141 | N  | 4.80  | 0.00 | 4.80  |
| 141 | N  | 180 | N  | 4.80  | 0.00 | 4.80  |
| 24  | N  | 102 | N  | 9.60  | 0.00 | 9.60  |
| 24  | N  | 141 | N  | 14.40 | 0.00 | 14.40 |
| 24  | N  | 180 | N  | 19.20 | 0.00 | 19.20 |
| 24  | CA | 63  | CA | 4.80  | 0.00 | 4.80  |
| 63  | CA | 102 | CA | 4.80  | 0.00 | 4.80  |
| 102 | CA | 141 | CA | 4.80  | 0.00 | 4.80  |
| 141 | CA | 180 | CA | 4.80  | 0.00 | 4.80  |
| 24  | CA | 102 | CA | 9.60  | 0.00 | 9.60  |
| 24  | CA | 141 | CA | 14.40 | 0.00 | 14.40 |
| 24  | CA | 180 | CA | 19.20 | 0.00 | 19.20 |
| 24  | CB | 102 | CB | 9.60  | 0.00 | 9.60  |
| 24  | CB | 180 | CB | 19.20 | 0.00 | 19.20 |
| 25  | N  | 64  | N  | 4.80  | 0.00 | 4.80  |
| 64  | N  | 103 | N  | 4.80  | 0.00 | 4.80  |
| 103 | N  | 142 | N  | 4.80  | 0.00 | 4.80  |
| 142 | N  | 181 | N  | 4.80  | 0.00 | 4.80  |
| 25  | N  | 103 | N  | 9.60  | 0.00 | 9.60  |
| 25  | N  | 142 | N  | 14.40 | 0.00 | 14.40 |
| 25  | N  | 181 | N  | 19.20 | 0.00 | 19.20 |
| 25  | CA | 64  | CA | 4.80  | 0.00 | 4.80  |
| 64  | CA | 103 | CA | 4.80  | 0.00 | 4.80  |
| 103 | CA | 142 | CA | 4.80  | 0.00 | 4.80  |
| 142 | CA | 181 | CA | 4.80  | 0.00 | 4.80  |
| 25  | CA | 103 | CA | 9.60  | 0.00 | 9.60  |
| 25  | CA | 142 | CA | 14.40 | 0.00 | 14.40 |
| 25  | CA | 181 | CA | 19.20 | 0.00 | 19.20 |
| 25  | CB | 103 | CB | 9.60  | 0.00 | 9.60  |
| 25  | CB | 181 | CB | 19.20 | 0.00 | 19.20 |
